# Supplementary material for: A facile access to cis-dihydrofurobenzofuran from 2-(2,5-dihydro-furan-2-yl)-phenol
Source: Royal Society of Chemistry journal article supplement (doi:10.1039/c6ra06840e), 2016-01-01

## *Supporting Information*

### **A Facile Access to Cis-dihydrofurobenzofuran from 2-(2,5-Dihydro-furan-2-yl)-phenol**

**Xiao-Hui Hu,<sup>a</sup> Xiao-Qiu Pu,<sup>a</sup> Rui Liu,<sup>a</sup> Chun-Xiao Cui,<sup>a</sup> Jun Yang,<sup>\*b</sup> Xian-Jin Yang<sup>\*a,b</sup>**

*<sup>a</sup>Key Lab for Advanced Materials & Institute of Fine Chemicals, East China University of Science and Technology, 130 Meilong Road, Shanghai 200237, China*

*<sup>b</sup>Key Laboratory of Organofluorine Chemistry, Shanghai Institute of Organic Chemistry, Chinese Academy of Science, 345 Lingling Road, Shanghai 200032, China*

*Email Address: [yxj@ecust.edu.cn](mailto:yxj@ecust.edu.cn)*

## Table of Contents

|                                                                                                                |                |
|----------------------------------------------------------------------------------------------------------------|----------------|
| <b>1. General information</b>                                                                                  | <b>S3</b>      |
| <b>2. Typical procedures</b>                                                                                   | <b>S4-S5</b>   |
| <b>3. X-ray diffraction parameters and data for 4j</b>                                                         | <b>S5-</b>     |
| <b>S6</b>                                                                                                      |                |
| <b>4. Notes and references</b>                                                                                 | <b>S6</b>      |
| <b>5. Analytical data for the products</b>                                                                     | <b>S6–S12</b>  |
| <b>6. <math>^1\text{H}</math>, <math>^{19}\text{F}</math> and <math>^{13}\text{C}</math> NMR spectral data</b> | <b>S13–S39</b> |

## 1. General information

All commercial reagents and solvents were used without further purification. Synthesis of 2-(2,5-dihydro-furan-2-yl)-phenols **3** were undertaken as previously described.<sup>1</sup> The products were purified by column chromatography over silica gel. All <sup>1</sup>H NMR spectra were recorded on a Bruker spectrometer at 400 MHz. The <sup>19</sup>F NMR spectra were recorded on a Bruker spectrometer at 376 MHz. The <sup>13</sup>C NMR spectra were recorded on a Bruker spectrometer at 100 MHz. Chemical shifts ( $\delta$  value) were reported in *ppm* down field from internal tetramethylsilane (TMS). IR spectra (KBr) were recorded on a Nicolet 6700 spectrophotometer in the range of 400~4000  $\text{cm}^{-1}$ . HRMS (EI) Mass Spectra were recorded on a Waters GCT Premier mass spectrometer with electron impact.

## 2. Typical procedures

### General procedure for the preparation of 2-(2,5-dihydro-furan-2-yl)-phenols **3a-m** (**3a** as an example):

4-Phenyl-1,2-oxaborol-2(5H)-ol **1a** (320 mg, 2.0 mmol), salicylaldehyde **2a** (244 mg, 2.0 mmol), morpholine (194 mg, 2.2 mmol) and in 1,2-dichloroethane (6.0 mL) were added into a flask with a condenser. The mixture was stirred at 85°C for 24 h. The reaction mixture was concentrated under reduced pressure. The product was isolated by flash chromatography (silica gel, petroleum ether : EtOAc = 10 : 1) to give **3a** (410.8 mg, 85%) as a white solid.

### General procedure for the preparation of **4** (**4a** as an example):

2-(4-Phenyl-2,5-dihydrofuran-2-yl)phenol **3a** (47.6 mg, 0.2 mmol), AgOAc (66.8 mg, 0.4 mmol), Pd(OAc)<sub>2</sub> (10 mol %) and MeCN (3.0 mL) were added into a tube, then the mixture was stirred at 85 °C for 12 h. The reaction mixture was concentrated under reduced pressure. The product was isolated by flash chromatography (silica gel, petroleum ether : EtOAc = 30 : 1) to give **4a** (34.0 mg, 72%) as a white solid.

**Table1. General procedure for the preparation of 3**

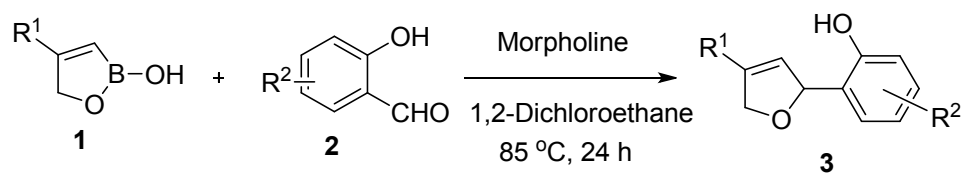

| entry | R <sup>1</sup> | <b>2</b>  | <b>3</b>  | yield (%) <sup>b</sup> |
|-------|----------------|-----------|-----------|------------------------|
| 1     |                | <b>2a</b> | <b>3a</b> | 86                     |
| 2     |                |           | <b>3b</b> | 88                     |
| 3     |                |           | <b>3c</b> | 85                     |
| 4     |                |           | <b>3d</b> | 79                     |
| 5     |                |           | <b>3e</b> | 89                     |
| 6     |                |           | <b>3f</b> | 83                     |
| 7     |                |           | <b>3g</b> | 80                     |
| 8     |                |           | <b>3h</b> | 85                     |
| 9     |                |           | <b>3i</b> | 90                     |
| 10    |                |           | <b>3j</b> | 84                     |
| 11    |                | <b>2a</b> | <b>3k</b> | 87                     |

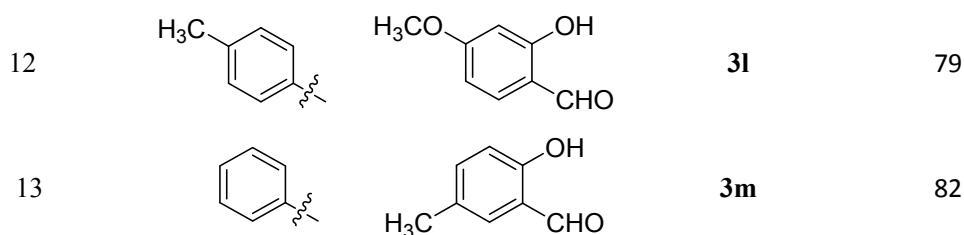

<sup>a</sup> The reaction was performed with 4-substituted 1,2-oxaborol-2(5H)-ols **1** (2.0 mmol), salicylaldehydes **2** (2.0 mmol), and morpholine (2.2 mmol) in 1,2-dichloroethane (6 mL) at 85 °C for 24 h. <sup>b</sup> Isolated yields.

### 3. X-ray diffraction parameters and data for 4j

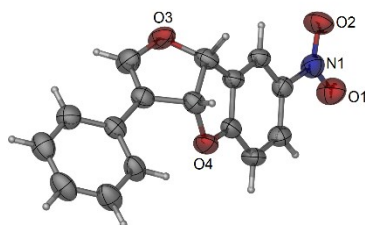

|                        |                                                  |                         |
|------------------------|--------------------------------------------------|-------------------------|
| Bond precision:        | C-C = 0.0031 Å                                   | Wavelength=0.71073      |
| Cell:                  | a=10.6863(5)    b=11.6232(6)                     | c=11.9288(6)            |
|                        | alpha=76.255(1)    beta=64.109(1)                | gamma=88.571(1)         |
| Temperature: 296 K     |                                                  |                         |
|                        | Calculated                                       | Reported                |
| Volume                 | 1289.50(11)                                      | 1289.50(11)             |
| Space group            | P -1                                             | P-1                     |
| Hall group             | -P 1                                             | ?                       |
| Moiety formula         | C <sub>16</sub> H <sub>11</sub> N O <sub>4</sub> | ?                       |
| Sum formula            | C <sub>16</sub> H <sub>11</sub> N O <sub>4</sub> | C6.50 H6.50 N6.50 O6.50 |
| Mr                     | 281.26                                           | 279.68                  |
| Dx, g cm <sup>-3</sup> | 1.449                                            | 1.441                   |
| Z                      | 4                                                | 4                       |
| Mu (mm <sup>-1</sup> ) | 0.106                                            | 0.129                   |
| F000                   | 584.0                                            | 572.0                   |
| F000'                  | 584.32                                           |                         |
| h,k,lmax               | 12,13,14                                         | 12,13,14                |
| Nref                   | 4546                                             | 4517                    |
| Tmin,Tmax              | 0.947,0.967                                      | 0.948,0.967             |
| Tmin'                  | 0.947                                            |                         |
| Correction method=     | MULTI-SCAN                                       |                         |

Data completeness= 0.994                      Theta(max)= 25.010  
R(reflections)= 0.0406( 3384)              wR2(reflections)= 0.1289( 4517)  
S = 1.040                                          Npar= 379

#### 4. Notes and references

1. Cui, C.-X.; Li, H.; Yang X.-J.; Y, J.; Li, X.-Q. *Org. Lett.* **2013**, *15*, 5944.

#### 5. Analytical data for the products

##### 5-Methoxy-2-(4-phenyl-2,5-dihydrofuran-2-yl)phenol (**3b**)

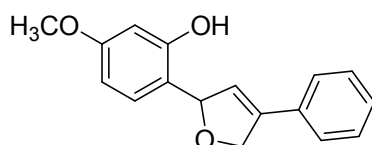

**Compound 3b** A white solid;  $^1\text{H NMR}$  (400 MHz,  $\text{CDCl}_3$ )  $\delta$ : 7.86 (s, 1H), 7.37-7.31 (m, 5H), 6.98 (d,  $J = 8.8$  Hz, 1H), 6.47-6.43 (m, 2H), 6.35 (q,  $J = 2.0, 4.0$  Hz, 1H), 6.21 (t,  $J = 4.8$  Hz, 1H), 5.23-5.17 (m, 1H), 5.14-5.09 (m, 1H), 3.78 (s, 1H);  $^{13}\text{C NMR}$  (100 MHz,  $\text{CDCl}_3$ )  $\delta$ : 160.7, 156.7, 139.1, 131.9, 128.9, 128.7, 127.7, 126.1, 122.9, 117.3, 106.2, 102.6, 88.3, 75.2, 55.5; IR (KBr,  $\text{cm}^{-1}$ ):  $\nu = 3236, 2900, 2880, 2860, 1614, 1519, 1450, 1428, 1388, 1288, 1213, 1061, 831, 748, 688$ ; HRMS (EI): Exact mass calcd for  $\text{C}_{17}\text{H}_{16}\text{O}_3$  : 268.1099, Found 268.1094.

##### 4-Methoxy-2-(4-phenyl-2,5-dihydrofuran-2-yl)phenol (**3c**)

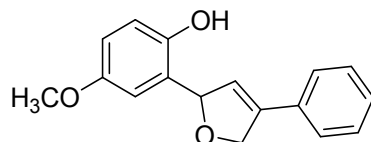

**Compound 3c** A white solid;  $^1\text{H NMR}$  (400 MHz,  $\text{CDCl}_3$ )  $\delta$ : 7.37-7.31 (m, 5H), 6.81 (d,  $J = 8.8$  Hz, 1H), 6.76-6.72 (m, 1H), 6.70 (d,  $J = 2.8$  Hz, 1H), 6.37 (q,  $J = 2.0, 4.0$  Hz, 1H), 6.24 (t,  $J = 4.8$  Hz, 1H), 5.25-5.19 (m, 1H), 5.17-5.11 (m, 1H), 3.77 (s, 3H);  $^{13}\text{C NMR}$  (100 MHz,  $\text{CDCl}_3$ )  $\delta$ : 153.3, 148.8, 139.0, 131.9, 128.9, 128.7, 126.2, 126.1, 122.5, 117.7, 114.1, 112.5, 87.9, 75.5, 55.9; IR (KBr,  $\text{cm}^{-1}$ ):  $\nu = 3352, 2964, 2855, 2835, 1611, 1542, 1450, 1432, 1262, 1037, 804, 754, 694$ ; HRMS (EI): Exact mass calcd for  $\text{C}_{17}\text{H}_{16}\text{O}_3$ : 268.1099, Found 268.1096.

##### 5-Fluoro-2-(4-phenyl-2,5-dihydrofuran-2-yl)phenol (**3e**)

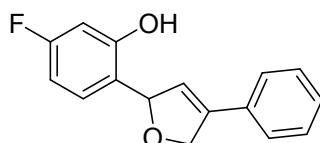

**Compound 3e** A white solid;  $^1\text{H NMR}$  (400 MHz,  $\text{CDCl}_3$ )  $\delta$ : 8.11 (s, 1H), 7.40-7.31 (m, 5H), 7.05-7.01 (m, 1H), 6.62-6.56 (m, 2H), 6.35 (q,  $J = 2.0, 4.0$  Hz, 1H), 6.24 (t,  $J = 4.4$  Hz, 1H), 5.24-5.18 (m, 1H), 5.15-5.11 (m, 1H);  $^{19}\text{F NMR}$  (376 MHz,  $\text{CDCl}_3$ )  $\delta$ :

-133.07;  $^{13}\text{C}$  NMR (100 MHz,  $\text{CDCl}_3$ )  $\delta$ : 163.3 (d,  $J = 243.9$  Hz), 156.9 (d,  $J = 11.9$  Hz), 113.1, 131.7, 128.9, 128.9, 127.8 (d,  $J = 10.1$  Hz), 126.1, 122.3, 121.0 (d,  $J = 3.4$  Hz), 106.9 (d,  $J = 21.6$  Hz), 104.7 (d,  $J = 24.1$  Hz), 88.1, 75.4; IR (KBr,  $\text{cm}^{-1}$ ):  $\nu = 3185, 2903, 2885, 2861, 1606, 1511, 1497, 1435, 1270, 1150, 846, 745, 685$ ; HRMS (EI): Exact mass calcd for  $\text{C}_{16}\text{H}_{13}\text{FO}_2$ : 256.0900, Found 256.0897.

**2-Fluoro-6-(4-phenyl-2,5-dihydrofuran-2-yl)phenol (3f)**

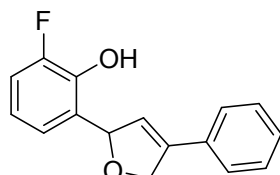

**Compound 3f** A white solid;  $^1\text{H}$  NMR (400 MHz,  $\text{CDCl}_3$ )  $\delta$ : 7.36 (d,  $J = 4.4$  Hz, 4H), 7.29-7.34 (m, 1H), 6.98-7.03 (m, 1H), 6.90 (s, 1H), 6.80-6.85 (m, 1H), 5.22-5.27 (m, 1H), 5.14-5.19 m, 1H);  $^{13}\text{C}$  NMR (100 MHz,  $\text{CDCl}_3$ )  $\delta$ : 151.6 (d,  $J = 238.8$  Hz), 142.3 (d,  $J = 13.8$  Hz), 132.0, 128.9, 128.9, 128.9, 126.1, 122.4, 121.9 (d,  $J = 3.2$  Hz), 120.0 (d,  $J = 7.1$  Hz), 115.0 (d,  $J = 18.1$  Hz), 86.2 (d,  $J = 2.9$  Hz), 75.6; IR (KBr,  $\text{cm}^{-1}$ ):  $\nu = 3148, 2922, 2867, 1613, 1578, 1496, 1545, 1475, 1264, 1061, 946, 841, 687$ ; HRMS (EI): Exact mass calcd for  $\text{C}_{16}\text{H}_{13}\text{FO}_2$ : 256.0900, Found 256.0898.

**4-Fluoro-2-(4-phenyl-2,5-dihydrofuran-2-yl)phenol (3g)**

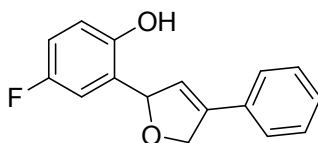

**Compound 3g** A white solid;  $^1\text{H}$  NMR (400 MHz,  $\text{CDCl}_3$ )  $\delta$ : 7.52 (s, 1H), 7.38-7.34 (m, 5H), 6.88-6.84 (m, 2H), 6.82-6.79 (m, 1H), 6.35 (q,  $J = 2.0, 4.0$  Hz, 1H), 6.23 (t,  $J = 4.4$  Hz, 1H), 5.25-5.20 (m, 1H), 5.17-5.13 (m, 1H);  $^{19}\text{F}$  NMR (376 MHz,  $\text{CDCl}_3$ )  $\delta$ : -124.19;  $^{13}\text{C}$  NMR (100 MHz,  $\text{CDCl}_3$ )  $\delta$ : 156.7 (d,  $J = 236.4$  Hz), 150.7 (d,  $J = 2.0$  Hz), 139.3, 131.7, 128.9, 128.8, 126.9 (d,  $J = 6.1$  Hz), 126.1, 121.9, 117.8 (d,  $J = 7.9$  Hz), 115.3 (d,  $J = 22.9$  Hz), 113.2 (d,  $J = 23.7$  Hz), 87.1 (d,  $J = 1.5$  Hz), 75.5; IR (KBr,  $\text{cm}^{-1}$ ):  $\nu = 3345, 3079, 2922, 2853, 1600, 1575, 1496, 1435, 1256, 1067, 758, 743, 689$ ; HRMS (EI): Exact mass calcd for  $\text{C}_{16}\text{H}_{13}\text{FO}_2$ : 256.0900, Found 256.0886.

**5-Chloro-2-(4-phenyl-2,5-dihydrofuran-2-yl)phenol (3h)**

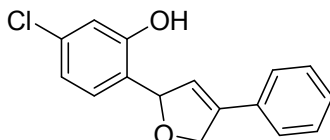

**Compound 3f** A white solid;  $^1\text{H}$  NMR (400 MHz,  $\text{CDCl}_3$ )  $\delta$ : 8.05 (s, 1H), 7.38-7.32 (m, 5H), 7.00 (d,  $J = 4$  Hz, 1H), 6.89-6.84 (m, 2H), 6.33 (q,  $J = 2.0, 4.0$  Hz, 1H), 6.23 (t,  $J = 8$  Hz, 1H), 5.24-5.18 (m, 1H), 5.17-5.10 (m, 1H);  $^{13}\text{C}$  NMR (100 MHz,  $\text{CDCl}_3$ )  $\delta$ : 156.2, 139.4, 134.4, 131.7, 128.9, 128.9, 127.7, 126.1, 123.5, 122.1, 120.2, 117.6, 88.16, 75.51; IR (KBr,  $\text{cm}^{-1}$ ):  $\nu = 3284, 3057, 2889, 2850, 1594, 1497, 1448, 1415, 1254, 1065, 898, 844, 740$ ; HRMS (EI): Exact mass calcd for  $\text{C}_{16}\text{H}_{13}\text{ClO}_2$ : 272.0604, Found 272.0433.

**2-Bromo-6-(4-phenyl-2,5-dihydrofuran-2-yl)phenol (3i)**

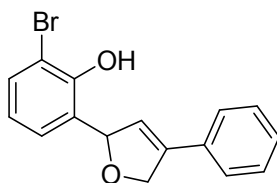

**Compound 3i** A white solid;  $^1\text{H}$  NMR (400 MHz,  $\text{CDCl}_3$ )  $\delta$ : 7.31 (dd,  $J = 6.4$  Hz, 8.0 Hz, 1H), 7.24-7.28 (m, 4H), 7.18-7.23 (m, 1H), 7.13-7.15 (m, 1H), 6.93 (s, 1H), 6.70 (t,  $J = 8.0$  Hz, 1H), 6.25-6.26 (m, 1H), 6.19-6.21 (m, 1H), 5.12-5.16 (m, 1H), 5.04-5.09 (m, 1H);  $^{13}\text{C}$  NMR (100 MHz,  $\text{CDCl}_3$ )  $\delta$ : 150.1, 138.8, 132.0, 131.6, 128.8, 128.6, 128.5, 126.0, 125.2, 122.5, 121.5, 110.9, 86.1, 75.6. IR (KBr,  $\text{cm}^{-1}$ ):  $\nu = 3326$ , 3029, 2858, 2827, 1596, 1594, 1494, 1449, 1240, 1115, 869, 762, 702; HRMS (EI): Exact mass calcd for  $\text{C}_{16}\text{H}_{13}\text{BrO}_2$ : 316.0099, Found 315.9934.

**5-Methoxy-2-(4-(p-tolyl)-2,5-dihydrofuran-2-yl)phenol (3l)**

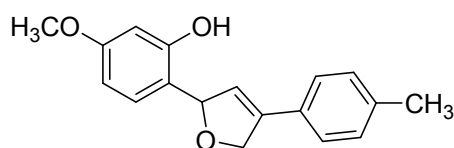

**Compound 3k** A white solid;  $^1\text{H}$  NMR (400 MHz,  $\text{CDCl}_3$ )  $\delta$ : 7.90 (s, 1H), 7.25 (d,  $J = 8.8$  Hz, 2H), 7.16 (d,  $J = 8.0$  Hz, 2H), 6.97 (d,  $J = 9.2$  Hz, 1H), 6.46-6.42 (m, 2H), 6.27 (q,  $J = 2.0, 4.0$  Hz, 1H), 6.19 (t,  $J = 4.4$  Hz, 1H), 5.20-5.15 (m, 1H), 5.12-5.06 (m, 1H) 3.77 (s, 3H), 2.36 (s, 3H);  $^{13}\text{C}$  NMR (100 MHz,  $\text{CDCl}_3$ )  $\delta$ : 160.7, 156.7, 138.9, 138.7, 129.6, 127.7, 129.1, 126.0, 121.8, 117.4, 106.2, 102.6, 88.4, 75.3, 55.5, 21.4; IR (KBr,  $\text{cm}^{-1}$ ):  $\nu = 3230$ , 3020, 2911, 2831, 1610, 1596, 1515, 1446, 1201, 1059, 958, 807, 798; HRMS (EI): Exact mass calcd for  $\text{C}_{18}\text{H}_{18}\text{O}_3$ : 282.1256, Found 282.1248.

**3-Phenyl-3a,8b-dihydrofuro[3,2-b]benzofuran (4a)**

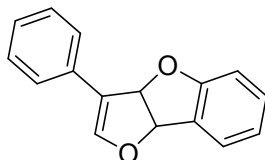

**Compound 4a** A white solid;  $^1\text{H}$  NMR (400 MHz,  $\text{CD}_3\text{CN}$ )  $\delta$ : 7.53-7.47 (m, 3H), 7.38-7.28 (m, 3H), 7.24-7.19 (m, 2H), 6.79 (dt,  $J = 0.8, 7.6$  Hz, 1H), 6.87 (d,  $J = 8.0$  Hz, 1H), 6.33 (d,  $J = 7.6$  Hz, 1H), 6.28 (d,  $J = 8.0$  Hz, 1H);  $^{13}\text{C}$  NMR (100 MHz,  $\text{CD}_3\text{CN}$ )  $\delta$ : 160.3, 147.6, 133.5, 132.3, 129.6, 127.5, 127.2, 126.3, 125.5, 121.8, 116.7, 111.5, 89.8, 87.2; IR (KBr,  $\text{cm}^{-1}$ ): 3084, 3058, 3025, 2963, 1630, 1473, 1448, 1238, 1180, 1117, 1102, 747, 730, 685; HRMS (EI): Exact mass calcd for  $\text{C}_{16}\text{H}_{12}\text{O}_2$ : 236.0837, Found 236.0838.

**6-Methoxy-3-phenyl-3a,8b-dihydrofuro[3,2-b]benzofuran (4b)**

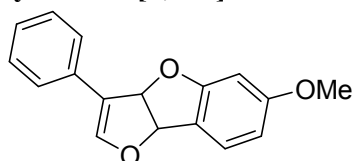

**Compound 4a** A white solid;  $^1\text{H}$  NMR (400 MHz,  $\text{CDCl}_3$ )  $\delta$ : 7.47 (d,  $J = 7.6$  Hz, 2H), 6.38-6.32 (m, 3H), 7.21 (t,  $J = 7.6$  Hz, 1H), 7.06 (s, 1H), 6.52 (dd,  $J = 2.4, 8.4$  Hz, 1H), 6.46 (d,  $J = 2.4$  Hz, 1H), 6.28 (d,  $J = 7.6$  Hz, 1H), 6.19 (d,  $J = 7.6$  Hz, 1H), 3.77



(s, 3H);  $^{13}\text{C}$  NMR (100 MHz,  $\text{CDCl}_3$ )  $\delta$ : 163.0, 161.4, 146.5, 132.5, 128.9, 126.7, 126.5, 124.7, 117.2, 115.8, 107.9, 96.5, 90.2, 86.4, 55.7; IR (KBr,  $\text{cm}^{-1}$ ): 3033, 2965, 2923, 2853, 1652, 1631, 1498, 1469, 1152, 1115, 1026, 826, 790, 760; HRMS (EI): Exact mass calcd for  $\text{C}_{17}\text{H}_{14}\text{O}_3$ : 266.0943, Found 266.0945.

**7-Methoxy-3-phenyl-3a,8b-dihydrofuro[3,2-b]benzofuran (4c)**

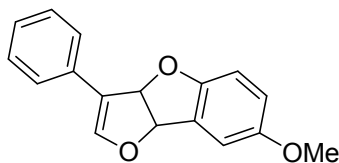

**Compound 4c** A white solid;  $^1\text{H}$  NMR (400 MHz,  $\text{CD}_3\text{CN}$ )  $\delta$ : 7.50-7.47 (m, 2H), 7.35 (t,  $J = 7.2$  Hz, 2H), 7.24-7.19 (m, 2H), 7.08 (d,  $J = 2.8$  Hz, 1H), 6.88 (dd,  $J = 2.4$ , 8.4 Hz, 1H), 6.77 (d,  $J = 8.8$  Hz, 1H), 6.31 (d,  $J = 7.6$  Hz, 1H), 6.24 (d,  $J = 7.6$  Hz, 1H), 3.76 (s, 3H);  $^{13}\text{C}$  NMR (100 MHz,  $\text{CD}_3\text{CN}$ )  $\delta$ : 155.3, 154.2, 147.4, 133.5, 129.6, 127.2, 126.7, 125.5, 118.6, 116.8, 111.9, 111.8, 89.9, 87.5, 56.5; IR (KBr,  $\text{cm}^{-1}$ ): 3021, 2953, 2925, 2830, 1630, 1603, 1490, 1435, 1233, 1197, 1126, 1036, 943, 907, 753, 687; HRMS (EI): Exact mass calcd for  $\text{C}_{17}\text{H}_{14}\text{O}_3$ : 266.0943, Found 266.0942.

**6-Fluoro-3-phenyl-3a,8b-dihydrofuro[3,2-b]benzofuran (4e)**

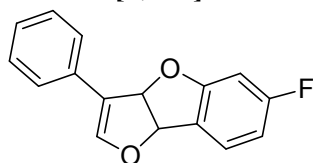

**Compound 4e** A white solid;  $^1\text{H}$  NMR (400 MHz,  $\text{CDCl}_3$ )  $\delta$ : 7.46-7.48 (m, 2H), 7.40-7.44 (m, 1H), 7.36 (t,  $J = 7.6$  Hz, 2H), 7.23 (t,  $J = 7.6$  Hz, 1H), 7.06 (s, 1H), 6.64-6.69 (m, 1H), 6.59-6.62 (m, 1H), 6.32 (d,  $J = 7.6$  Hz, 1H), 6.19 (d,  $J = 7.6$  Hz, 1H);  $^{13}\text{C}$  NMR (100 MHz,  $\text{CDCl}_3$ )  $\delta$ : 166.5 (d,  $J = 245.9$  Hz), 161.2 (d,  $J = 13.8$  Hz), 146.5, 132.1, 129.0, 127.1 (d,  $J = 11.0$  Hz), 126.7, 124.8, 121.0 (d,  $J = 2.2$  Hz), 120.9, 115.8, 108.2 (d,  $J = 23.3$  Hz), 99.3 (d,  $J = 26.3$  Hz), 90.7, 85.7; IR (KBr,  $\text{cm}^{-1}$ ): 3028, 2962, 2924, 2854, 1654, 1630, 1494, 1464, 1263, 1136, 1100, 824, 790; HRMS (EI): Exact mass calcd for  $\text{C}_{16}\text{H}_{11}\text{FO}_2$ : 254.0743, Found 254.0742. **5-Fluoro-3-phenyl-3a,8b-dihydrofuro[3,2-b]benzofuran (4f)**

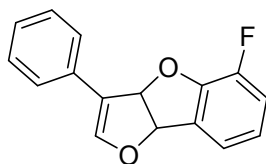

**Compound 4f** A white solid;  $^1\text{H}$  NMR (400 MHz,  $\text{CD}_3\text{CN}$ )  $\delta$ :  $^1\text{H}$  NMR (400 MHz,  $\text{CDCl}_3$ )  $\delta$ : 7.49-7.52 (m, 2H), 7.36 (t,  $J = 7.6$  Hz, 2H), 7.24-7.27 (m, 2H), 7.07 (s, 1H), 7.05-7.10 (m, 1H), 6.90-6.93 (m, 1H), 6.36 (d,  $J = 7.6$  Hz, 1H), 6.26 (d,  $J = 7.6$  Hz, 1H);  $^{19}\text{F}$  NMR (376 MHz,  $\text{CD}_3\text{CN}$ )  $\delta$ : -139.11;  $^{13}\text{C}$  NMR (100 MHz,  $\text{CDCl}_3$ )  $\delta$ : 148.4 (d,  $J = 245.6$  Hz), 146.8 (d,  $J = 31.0$  Hz), 146.6, 132.0, 128.9, 128.5 (d,  $J = 2.7$  Hz), 126.8, 124.9, 121.7 (t,  $J = 8.2$  Hz), 118.2 (d,  $J = 16.6$  Hz), 115.8, 90.8, 86.3 (d,  $J = 2.4$  Hz); IR (KBr,  $\text{cm}^{-1}$ ): 3091, 2962, 1633, 1599, 1490, 1465, 1259, 1195, 1114, 758, 737, 692; HRMS (EI): Exact mass calcd for  $\text{C}_{16}\text{H}_{11}\text{FO}_2$ : 254.0743, Found 254.0741.

**7-Fluoro-3-phenyl-3a,8b-dihydrofuro[3,2-b]benzofuran (4g)**

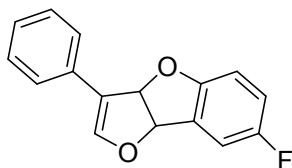

**Compound 4g** A white solid;  $^1\text{H}$  NMR (400 MHz,  $\text{CD}_3\text{CN}$ )  $\delta$ : 7.50-7.45 (m, 2H), 7.36 (t,  $J = 8.0$  Hz, 2H), 7.27 (dd,  $J = 2.8, 8.0$  Hz, 1H), 7.21 (s, 1H), 7.22 (t,  $J = 8.0$  Hz, 1H), 7.06 (dt,  $J = 2.8, 9.2$  Hz, 1H), 6.83 (dd,  $J = 4.0, 8.8$  Hz, 1H), 6.38 (d,  $J = 8.0$  Hz, 1H), 6.26 (d,  $J = 7.6$  Hz, 1H);  $^{19}\text{F}$  NMR (376 MHz,  $\text{CD}_3\text{CN}$ )  $\delta$ : -125.52;  $^{13}\text{C}$  NMR (100 MHz,  $\text{CD}_3\text{CN}$ )  $\delta$ : 158.1 (d,  $J = 234.6$  Hz), 156.5 (d,  $J = 1.0$  Hz), 147.6, 133.2, 129.7, 127.4 (d,  $J = 8.8$  Hz), 127.3, 125.6, 118.8 (d,  $J = 24.7$  Hz), 116.7, 113.8 (d,  $J = 24.7$  Hz), 112.6 (d,  $J = 8.5$  Hz), 90.7, 86.9 (d,  $J = 24.7$  Hz); IR (KBr,  $\text{cm}^{-1}$ ): 2973, 2926, 2900, 1655, 1629, 1487, 1447, 1113, 1093, 1050, 818, 752; HRMS (EI): Exact mass calcd for  $\text{C}_{16}\text{H}_{11}\text{FO}_2$ : 254.0743, Found 254.0739.

**6-Chloro-3-phenyl-3a,8b-dihydrofuro[3,2-b]benzofuran (4h)**

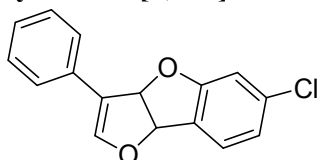

**Compound 4h** A white solid;  $^1\text{H}$  NMR (400 MHz,  $\text{CDCl}_3$ )  $\delta$ : 7.48-7.45 (m, 2H), 7.37 (dd,  $J = 8.4, 16.8$  Hz, 3H), 7.23 (t,  $J = 7.2$  Hz, 1H), 7.05 (s, 1H), 6.94 (dd,  $J = 2.0, 8.0$  Hz, 1H), 6.91 (d,  $J = 1.6$  Hz, 1H), 6.30 (d,  $J = 7.6$  Hz, 1H), 6.18 (d,  $J = 7.6$  Hz, 1H);  $^{13}\text{C}$  NMR (100 MHz,  $\text{CDCl}_3$ )  $\delta$ : 160.6, 146.5, 137.1, 132.1, 128.9, 127.0, 126.7, 124.8, 123.8, 121.4, 115.8, 111.9, 90.3, 85.6; IR (KBr,  $\text{cm}^{-1}$ ): 3028, 2962, 2924, 2854, 1654, 1628, 1607, 1477, 1117, 1064, 789, 752, 686; HRMS (EI): Exact mass calcd for  $\text{C}_{16}\text{H}_{11}\text{ClO}_2$ : 270.0448, Found 270.0449.

**5-Bromo-3-phenyl-3a,8b-dihydrofuro[3,2-b]benzofuran (4i)**

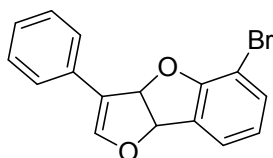

**Compound 4i** A white solid;  $^1\text{H}$  NMR (400 MHz,  $\text{CD}_3\text{CN}$ )  $\delta$ :  $^1\text{H}$  NMR (400 MHz,  $\text{CDCl}_3$ )  $\delta$ : 7.56 (d,  $J = 7.2$  Hz, 2H), 7.45-7.51 (m, 2H), 7.41 (t,  $J = 7.6$  Hz, 2H), 7.29 (d,  $J = 6.8$  Hz, 1H), 7.09 (s, 1H), 6.89 (t,  $J = 7.6$  Hz, 1H), 6.35 (d,  $J = 7.6$  Hz, 1H), 6.32 (d,  $J = 7.6$  Hz, 1H);  $^{13}\text{C}$  NMR (100 MHz,  $\text{CDCl}_3$ )  $\delta$ : 157.1, 140.7, 134.5, 132.1, 128.9, 126.7, 126.2, 125.4, 125.0, 122.4, 115.8, 104.2, 89.8, 86.8; IR (KBr,  $\text{cm}^{-1}$ ): 3058, 3023, 2863, 2925, 1628, 1448, 1427, 1260, 1019, 798, 705; HRMS (EI): Exact mass calcd for  $\text{C}_{16}\text{H}_{11}\text{BrO}_2$ : 313.9942, Found 313.9944.

**7-Nitro-3-phenyl-3a,8b-dihydrofuro[3,2-b]benzofuran (4j)**

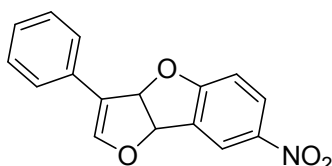

**Compound 4j** A white solid;  $^1\text{H}$  NMR (400 MHz,  $\text{CDCl}_3$ )  $\delta$ : 8.41 (d,  $J = 2.0$  Hz, 1H), 8.25 (dd,  $J = 2.4, 8.8$  Hz, 1H), 7.46 (d,  $J = 7.6$  Hz, 2H), 7.37 (t,  $J = 7.6$  Hz, 2H), 7.27-7.23 (m, 1H), 7.08 (s, 1H), 6.96 (d,  $J = 8.8$  Hz, 1H), 6.45 (d,  $J = 8.0$  Hz, 1H), 6.25 (d,  $J = 7.6$  Hz, 1H);  $^{13}\text{C}$  NMR (100 MHz,  $\text{CDCl}_3$ )  $\delta$ : 164.8, 146.9, 142.3, 131.5, 129.0, 128.4, 127.1, 126.4, 124.8, 123.4, 115.6, 111.4, 92.0, 84.6; IR (KBr,  $\text{cm}^{-1}$ ): 3084, 2961, 2923, 2852, 1628, 1598, 1527, 1473, 1339, 1239, 1107, 761, 688; HRMS (EI): Exact mass calcd for  $\text{C}_{16}\text{H}_{11}\text{NO}_4$ : 281.0688, Found 281.0692.

**3-(p-tolyl)-3a,8b-dihydrofuro[3,2-b]benzofuran (4k)**

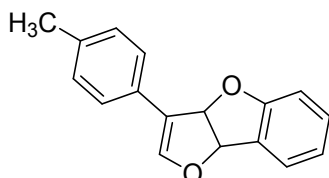

**Compound 4k** A white solid;  $^1\text{H}$  NMR (400 MHz,  $\text{CDCl}_3$ )  $\delta$ : 7.50 (d,  $J = 7.4$  Hz, 1H), 7.39 (d,  $J = 8.0$  Hz, 2H), 7.31 (t,  $J = 7.6$  Hz, 1H), 7.18 (d,  $J = 7.6$  Hz, 2H), 7.01 (s, 1H), 6.97 (dt,  $J = 0.8, 7.6$  Hz, 1H), 6.92 (d,  $J = 8.0$  Hz, 1H), 6.25 (d,  $J = 8.4$  Hz, 1H), 6.22 (d,  $J = 8.0$  Hz, 1H), 3.62 (s, 3H);  $^{13}\text{C}$  NMR (100 MHz,  $\text{CDCl}_3$ )  $\delta$ : 159.7, 145.6, 136.3, 131.5, 129.6, 129.4, 126.4, 125.0, 124.7, 121.0, 115.8, 111.2, 89.2, 86.3, 21.3; IR (KBr,  $\text{cm}^{-1}$ ): 3083, 2965, 2922, 2853, 1656, 1630, 1436, 1446, 1236, 1109, 1027, 812, 761, 686; HRMS (EI): Exact mass calcd for  $\text{C}_{17}\text{H}_{14}\text{O}_2$ : 250.0994, Found 250.0993.

**6-Methoxy-3-(p-tolyl)-3a,8b-dihydrofuro[3,2-b]benzofuran (4l)**

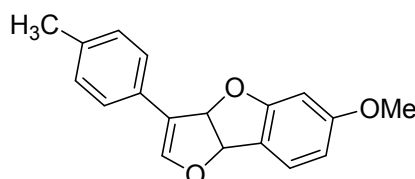

**Compound 4l** A white solid;  $^1\text{H}$  NMR (400 MHz,  $\text{CD}_3\text{CN}$ )  $\delta$ : 7.37 (dd,  $J = 2.0, 8.0$  Hz, 3H), 7.17 (d,  $J = 7.6$  Hz, 2H), 7.14 (s, 1H), 6.52 (dd,  $J = 2.4, 8.4$  Hz, 1H), 6.43 (d,  $J = 2.0$  Hz, 1H), 6.32 (d,  $J = 7.6$  Hz, 1H), 6.18 (d,  $J = 8.0$  Hz, 1H), 3.75 (s, 3H), 2.32 (s, 3H);  $^{13}\text{C}$  NMR (100 MHz,  $\text{CD}_3\text{CN}$ )  $\delta$ : 163.8, 162.1, 146.9, 136.9, 130.6, 130.2, 127.8, 125.4, 118.5, 116.5, 108.3, 96.9, 91.1, 86.8, 56.1, 21.1; IR (KBr,  $\text{cm}^{-1}$ ): 3028, 2963, 2923, 2854, 1654, 1630, 1500, 1446, 1109, 1027, 812; HRMS (EI): Exact mass calcd for  $\text{C}_{18}\text{H}_{16}\text{O}_3$ : 280.1099, Found 280.1101.

**7-Methyl-3-phenyl-3a,8b-dihydrofuro[3,2-b]benzofuran (4m)**

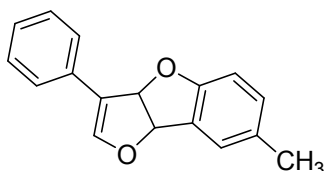

**Compound 4m** A white solid;  $^1\text{H}$  NMR (400 MHz,  $\text{CD}_3\text{CN}$ )  $\delta$ : 7.91 (s, 1H), 7.63-7.60 (m, 2H), 7.57 (d,  $J = 2.4$  Hz, 1H), 7.40 (t,  $J = 7.6$  Hz, 3H), 7.29 (t,  $J = 8.0$  Hz, 2H), 6.99 (d,  $J = 8.0$  Hz, 1H), 6.76 (d,  $J = 8.0$  Hz, 1H), 2.30 (s, 3H);  $^{13}\text{C}$  NMR (100 MHz,  $\text{CD}_3\text{CN}$ )  $\delta$ : 152.7, 151.7, 138.3, 133.4, 130.3, 130.1, 129.8, 129.0, 128.0, 126.9,

126.6, 118.1, 117.0, 108.6, 20.6; IR (KBr,  $\text{cm}^{-1}$ ): 3028, 2920, 2853, 1607, 1509, 1488, 1449, 1195, 1144, 753, 695; HRMS (EI): Exact mass calcd for  $\text{C}_{17}\text{H}_{14}\text{O}_2$ : 250.0994, Found 250.0995.

**2-(4-Phenylfuran-2-yl)phenol (5a)**

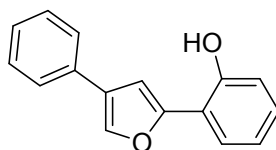

**Compound 5a** A white solid;  $^1\text{H}$  NMR (400 MHz,  $\text{CDCl}_3$ )  $\delta$ : 7.80 (s, 1H), 7.60 (d,  $J = 8.0$  Hz, 1H), 7.55 (d,  $J = 8.0$  Hz, 2H), 7.42 (t,  $J = 7.6$  Hz, 2H), 7.31 (t,  $J = 7.6$  Hz, 1H), 7.23 (t,  $J = 7.8$  Hz, 1H), 7.04 (s, 1H), 7.00-6.96 (m, 2H), 6.89 (s, 1H);  $^{13}\text{C}$  NMR (100 MHz,  $\text{CDCl}_3$ )  $\delta$ : 153.5, 152.7, 137.1, 132.0, 129.5, 129.0, 128.5, 127.6, 126.4, 126.1, 120.9, 117.3, 116.6, 106.1; IR (KBr,  $\text{cm}^{-1}$ ):  $\nu = 3344, 3150, 3065, 2926, 1587, 1531, 1497, 1450, 913, 823, 753, 690$ ; HRMS (EI): Exact mass calcd for  $\text{C}_{16}\text{H}_{12}\text{O}_2$ : 236.0837, Found 236.0839.

## 6. $^1\text{H}$ , $^{19}\text{F}$ and $^{13}\text{C}$ NMR spectral data

### 3b ( $\text{CDCl}_3$ )

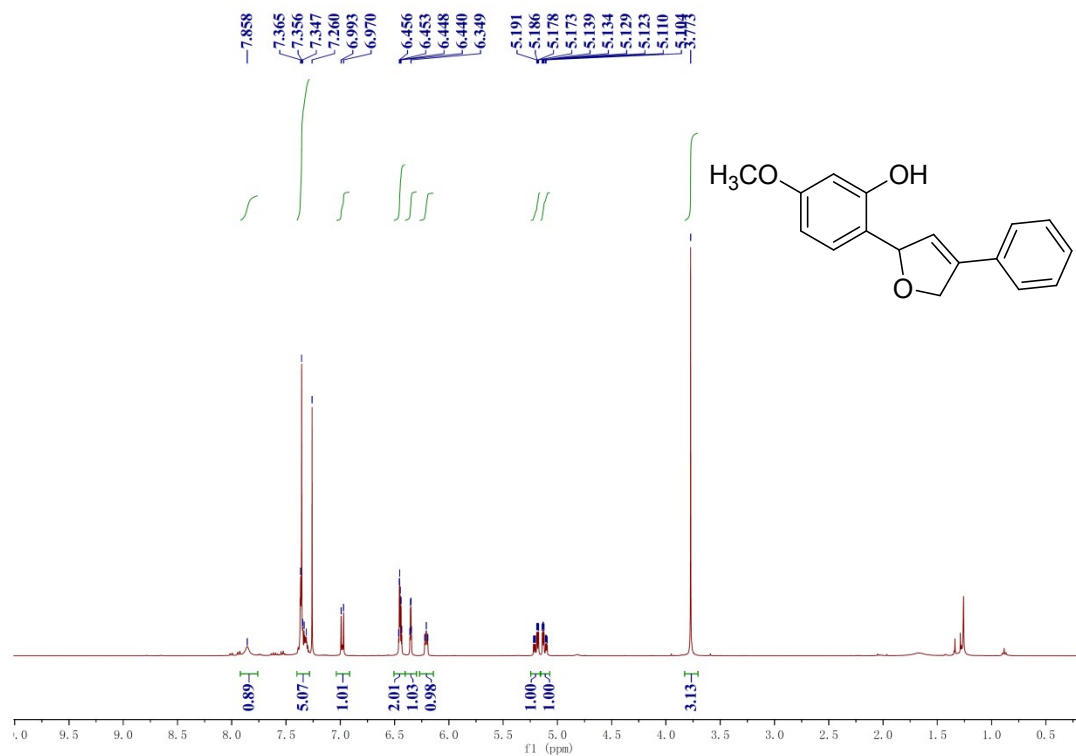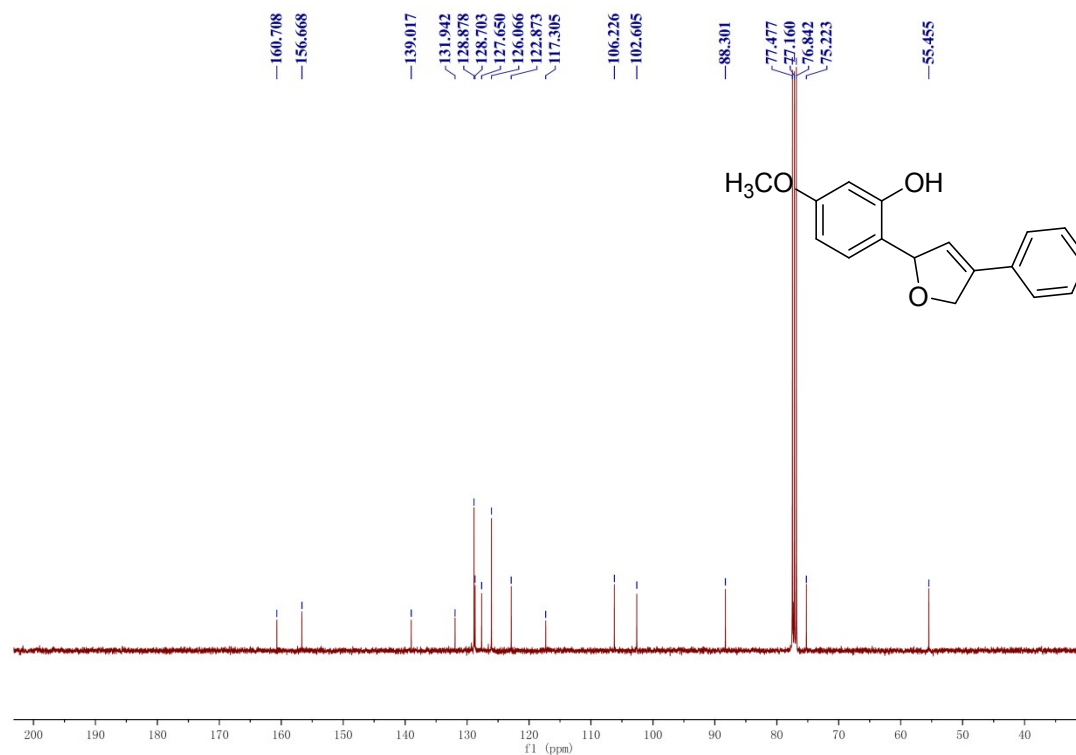

3c (CDCl<sub>3</sub>)

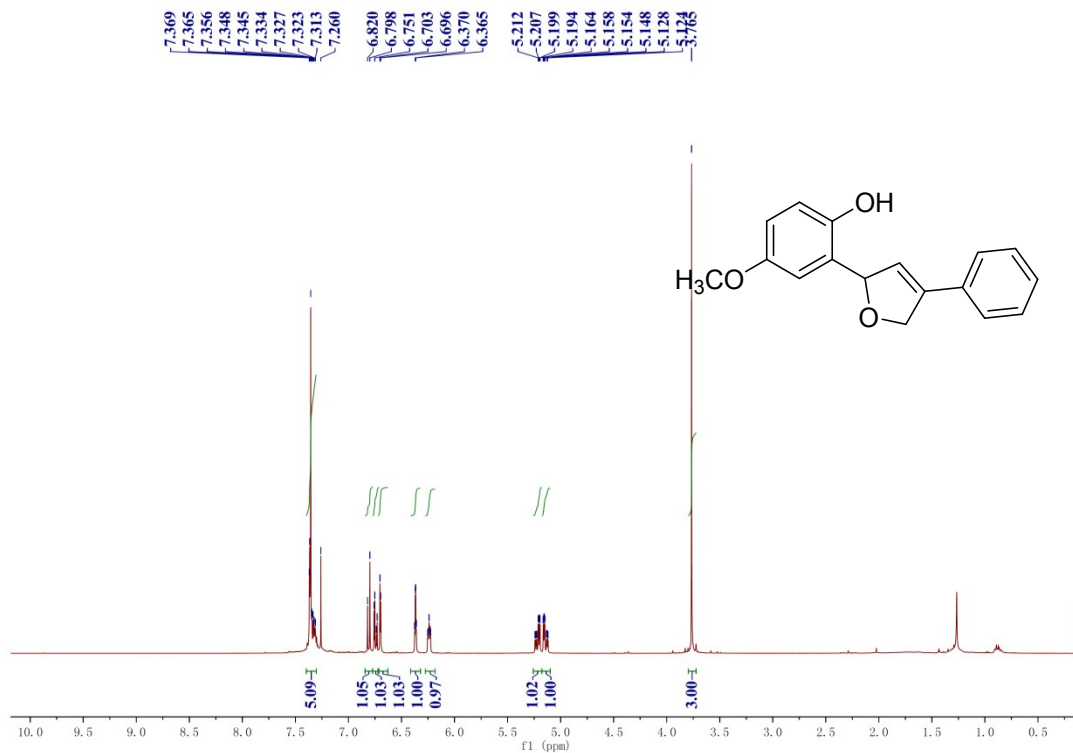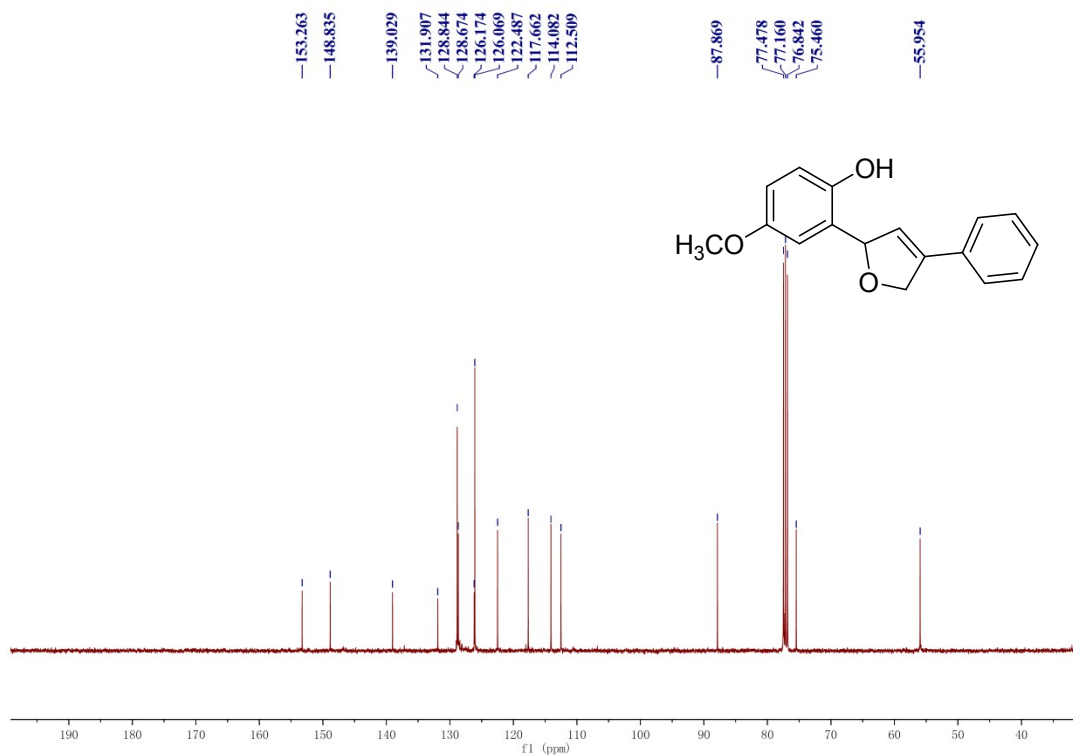

3e (CDCl<sub>3</sub>)

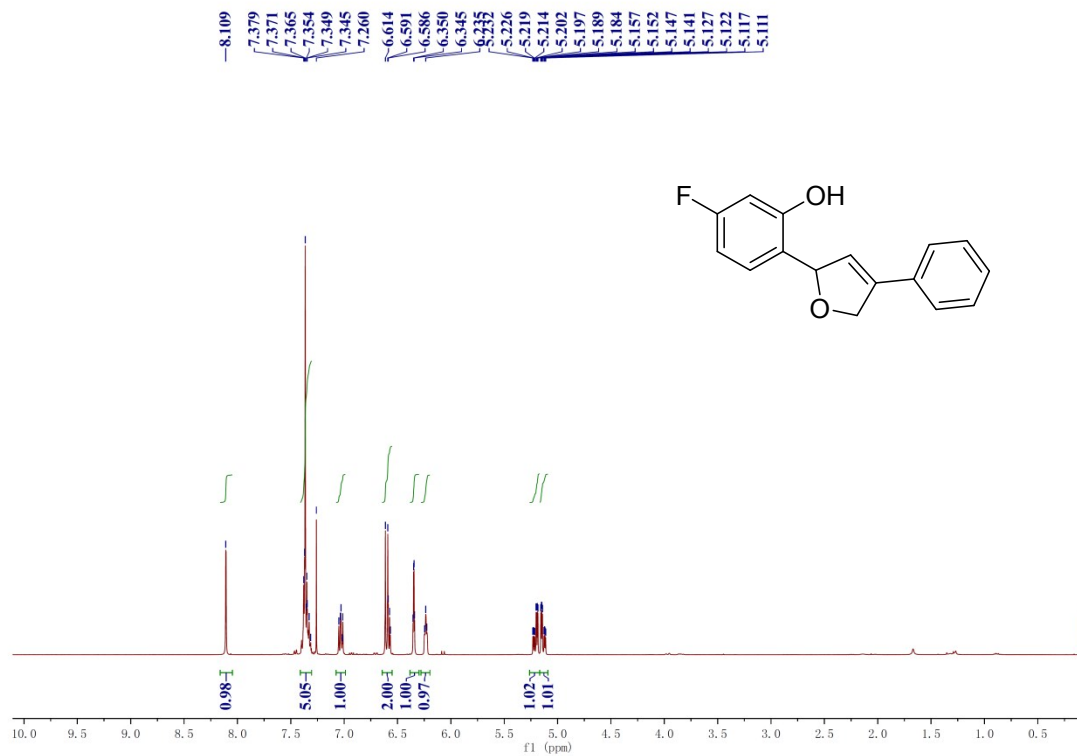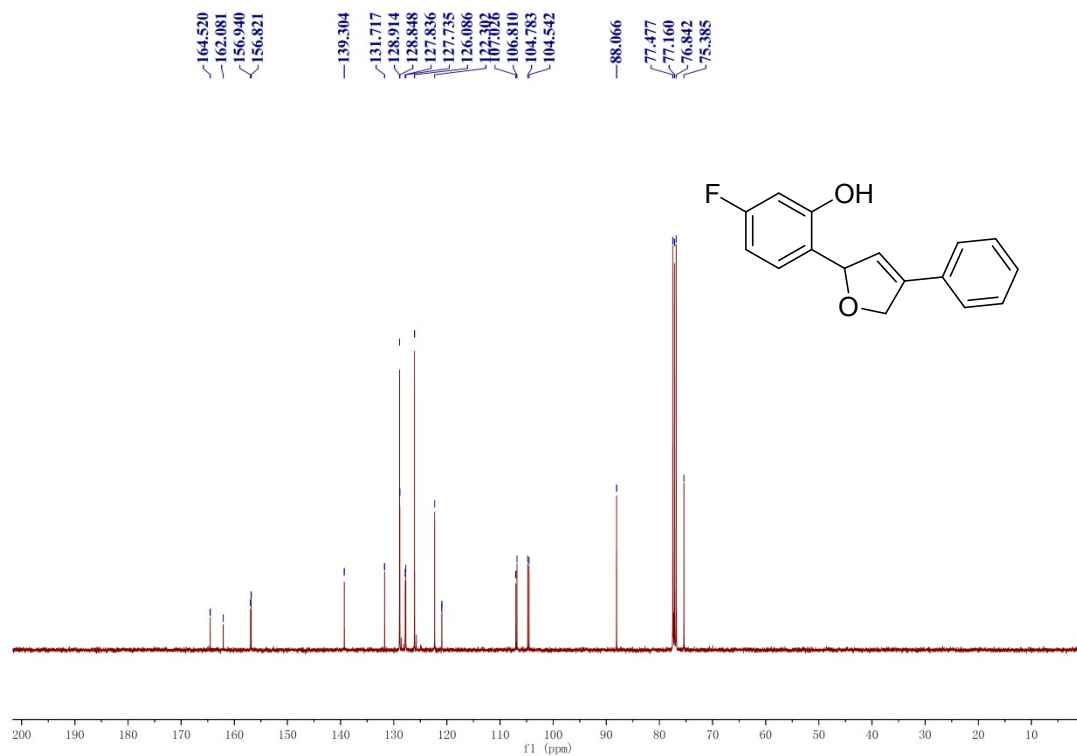

-113.077

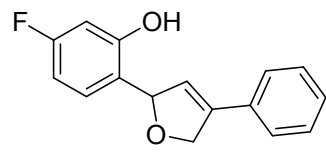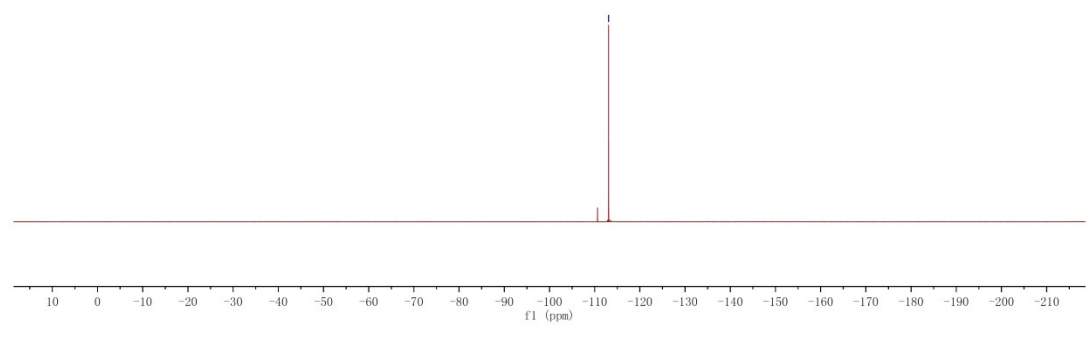





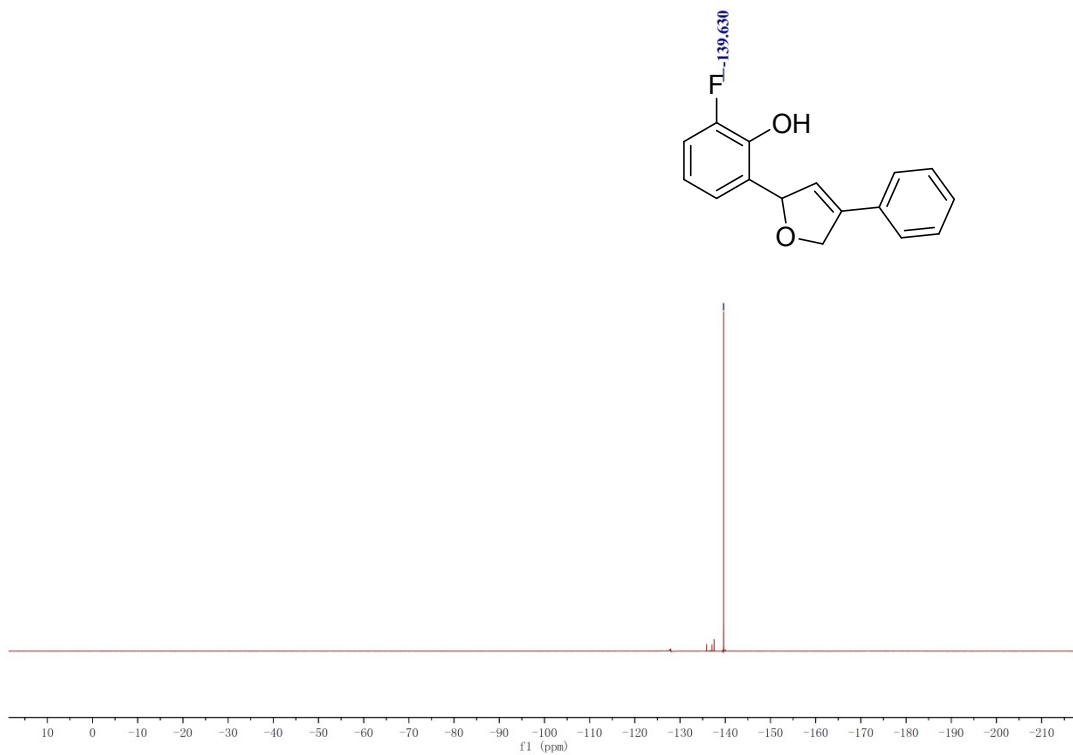

### 3g (CDCl<sub>3</sub>)

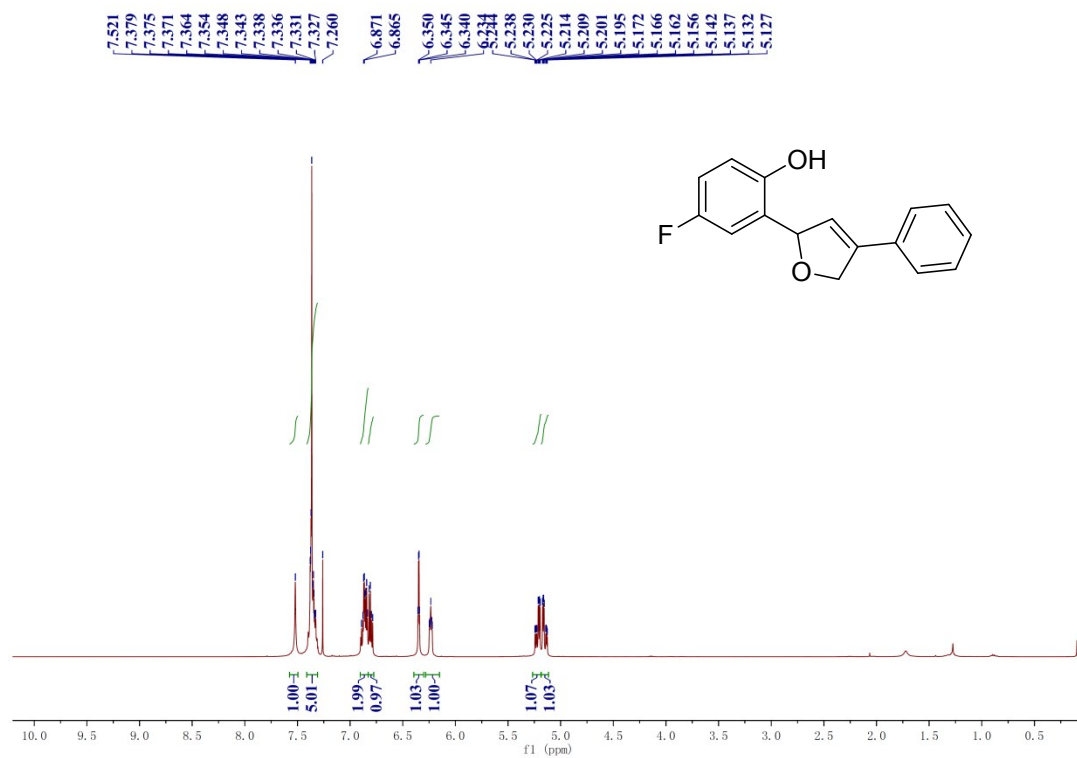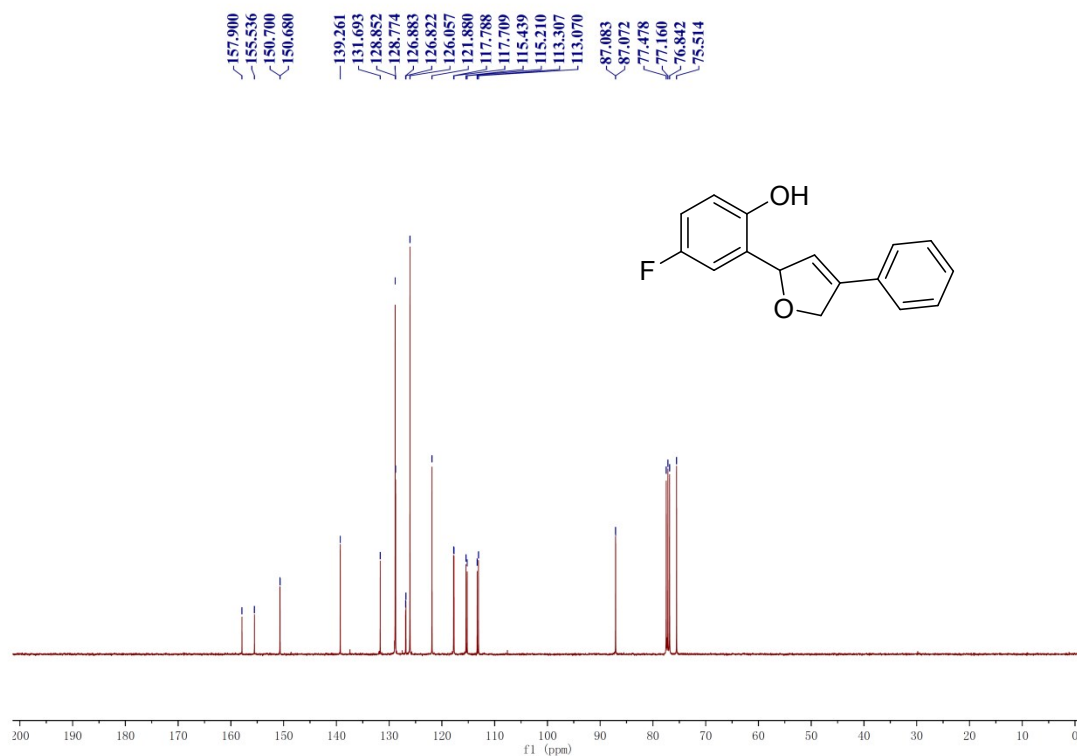

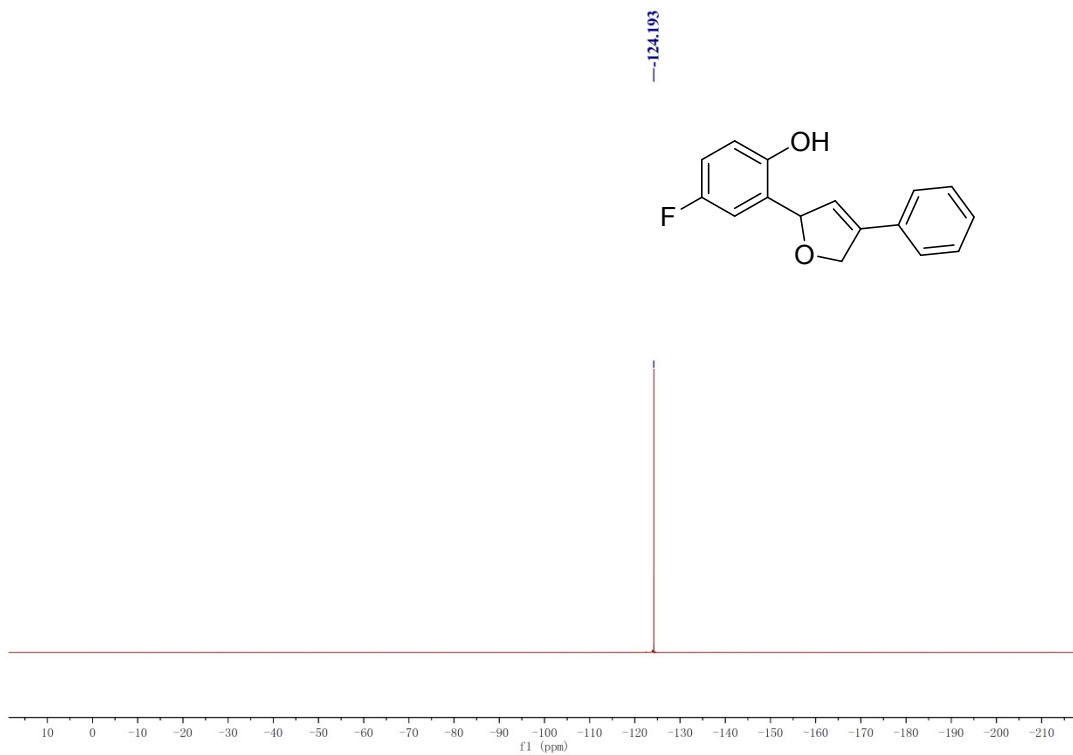

3h (CDCl<sub>3</sub>)

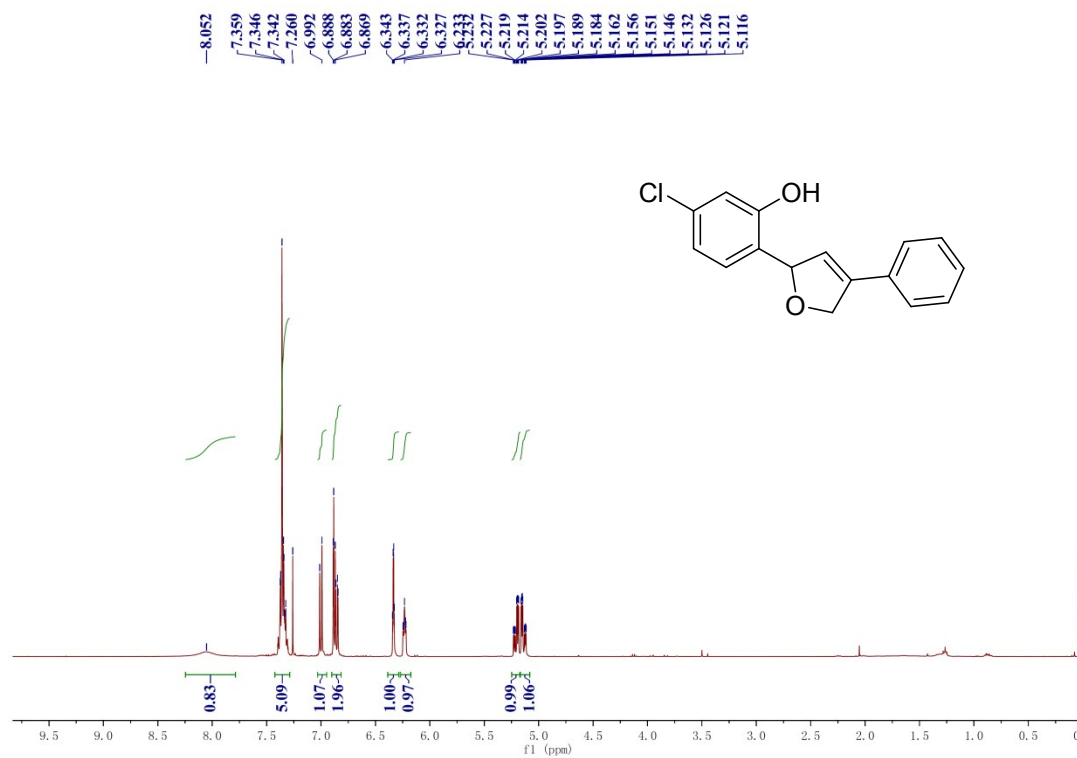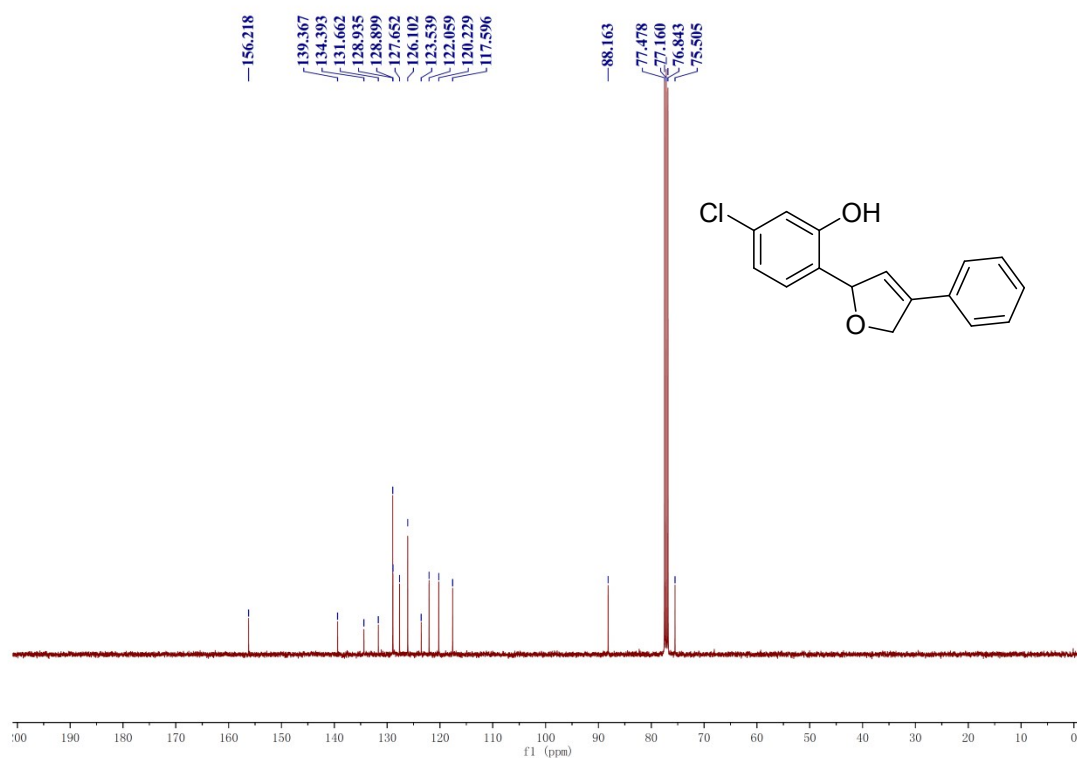



3I (CDCl<sub>3</sub>)

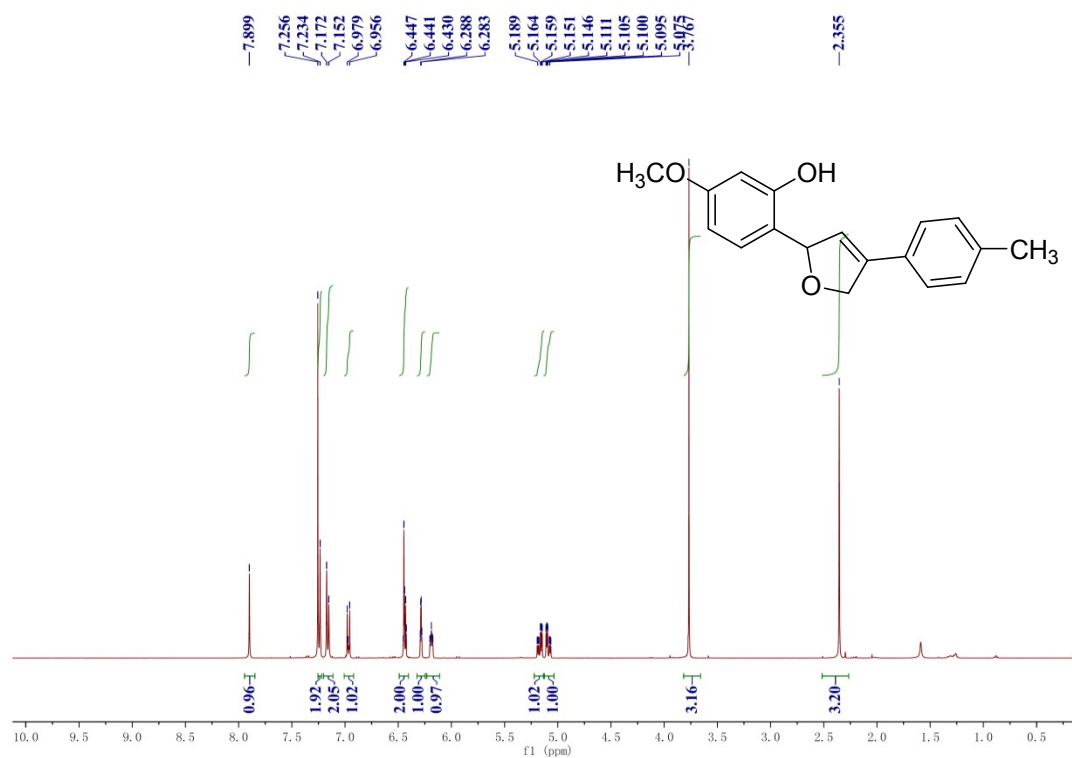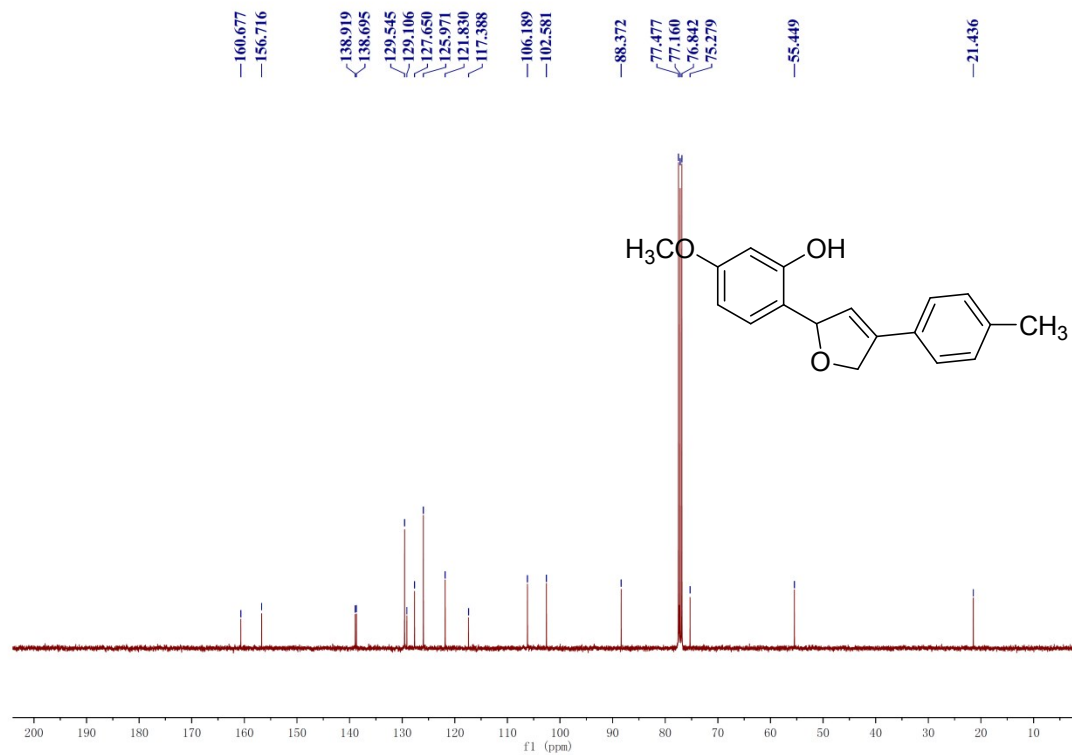

# 4a (CD<sub>3</sub>CN)

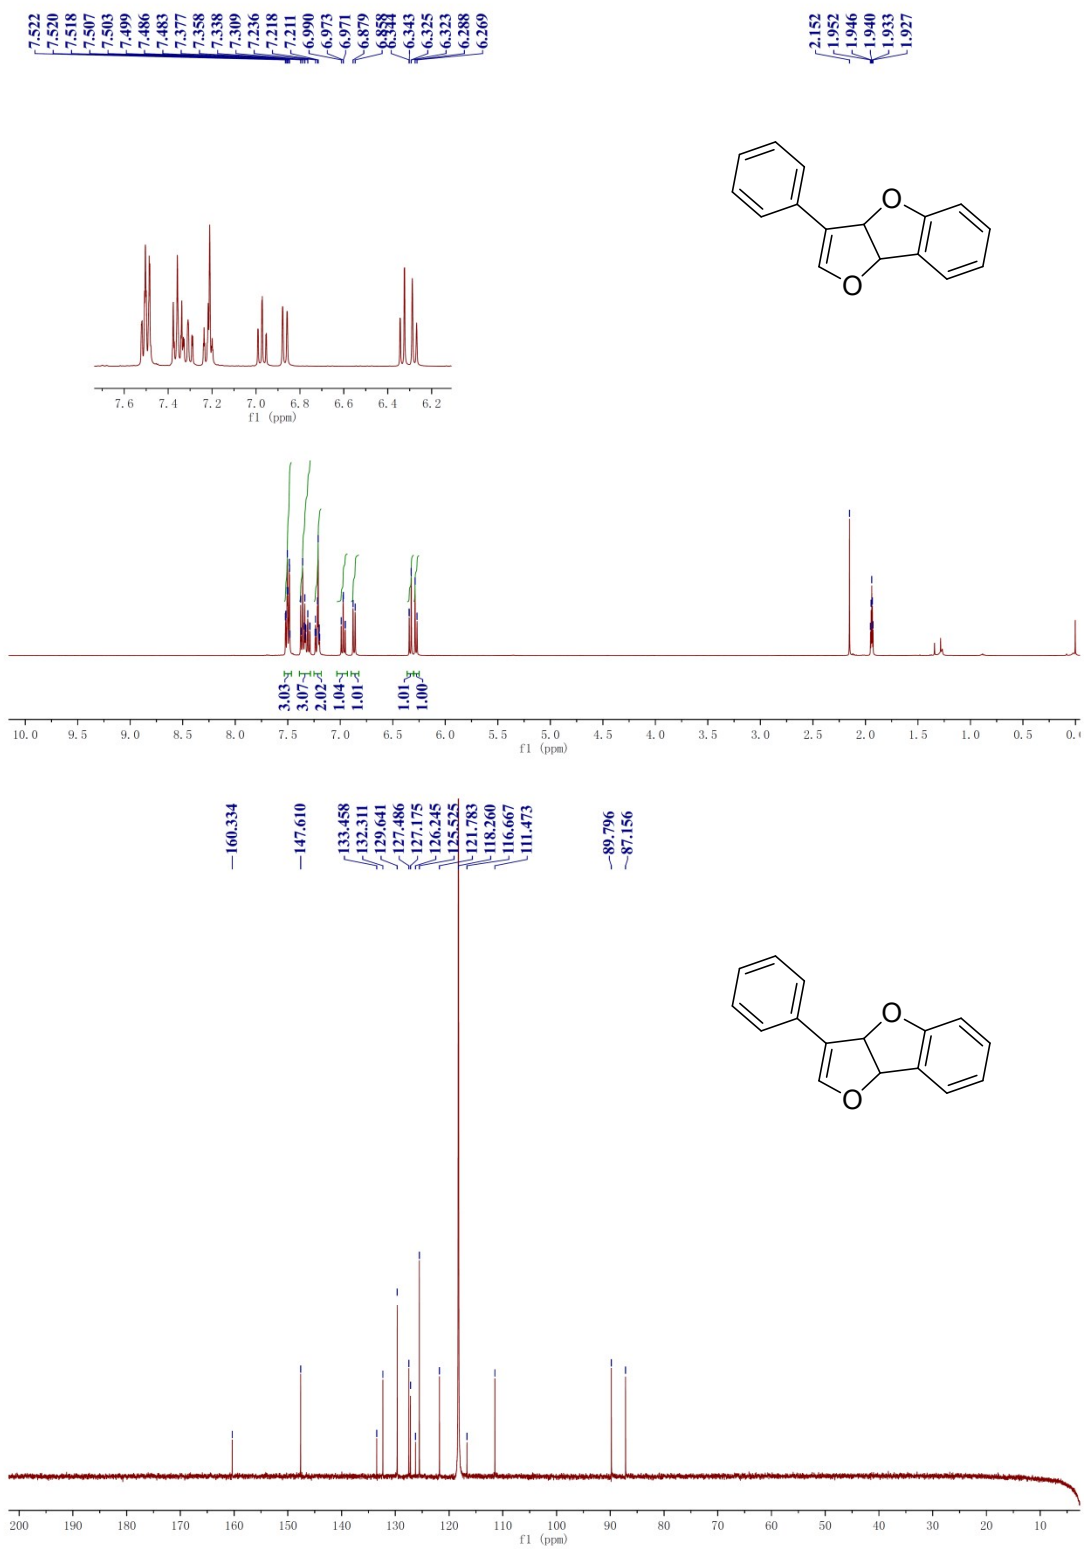



# 4b (CDCl<sub>3</sub>)

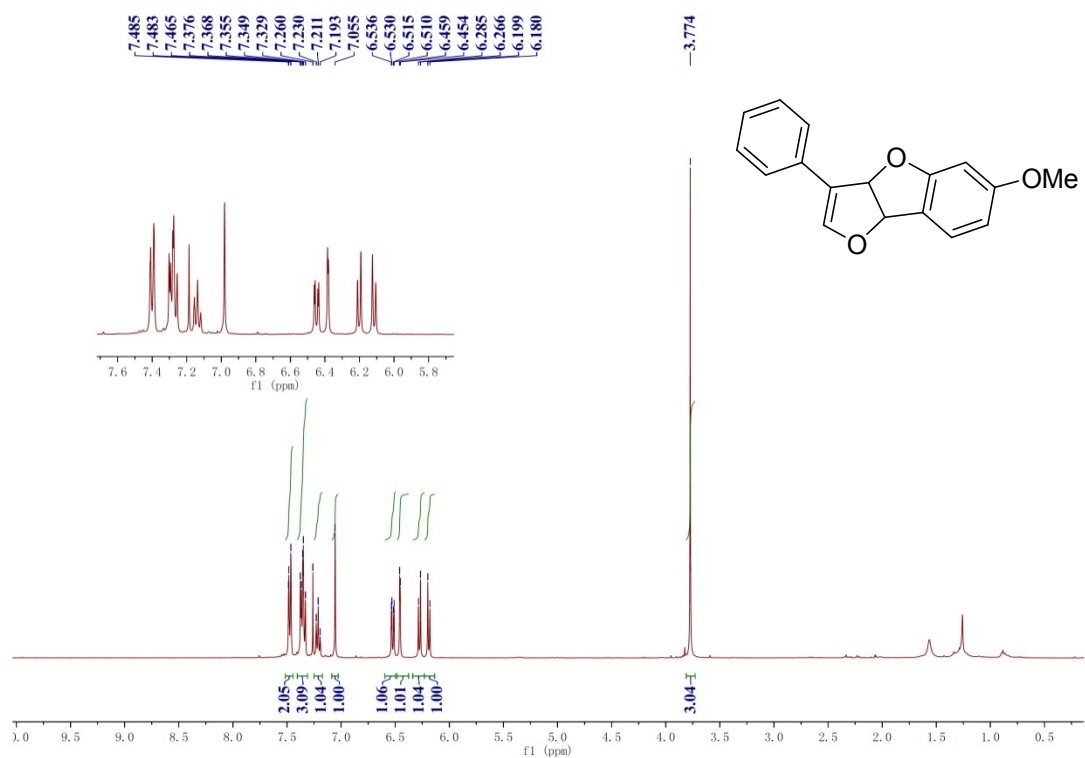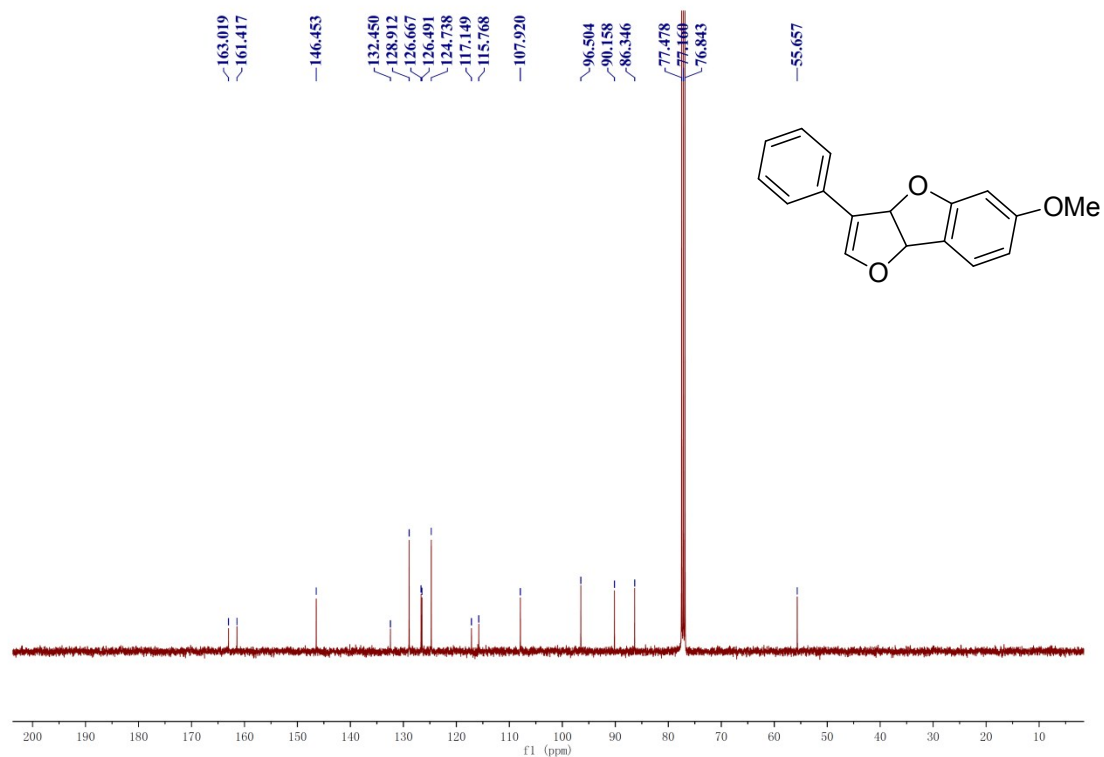

# 4c (CD<sub>3</sub>CN)

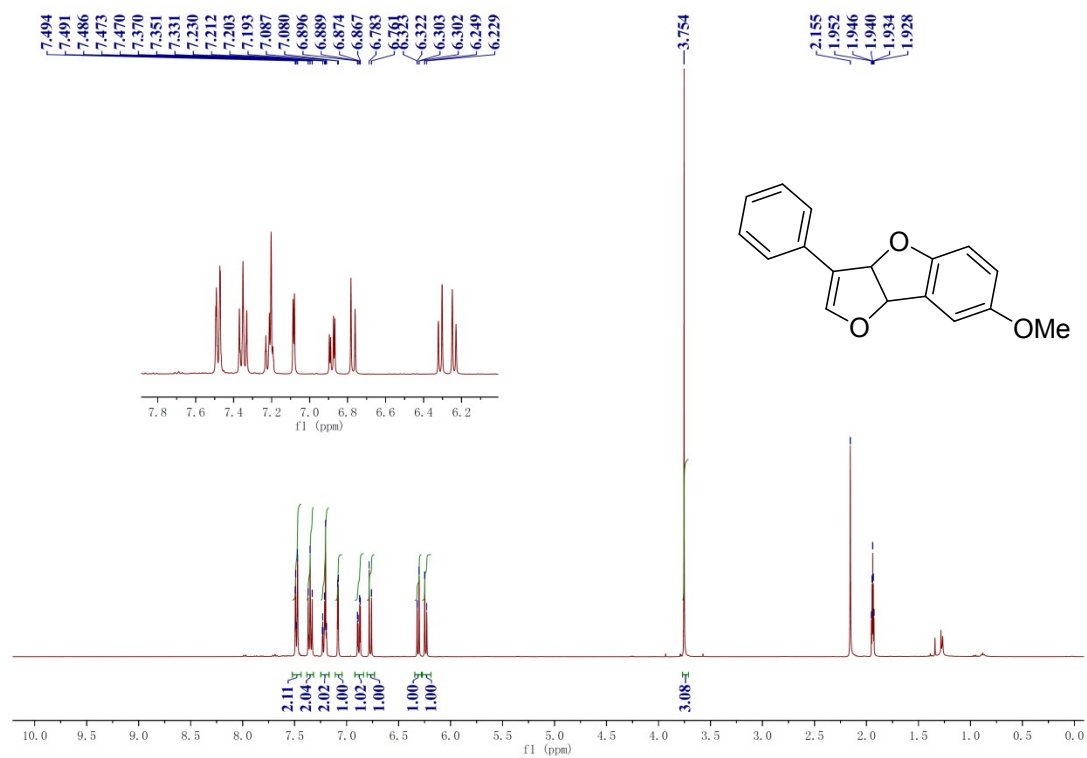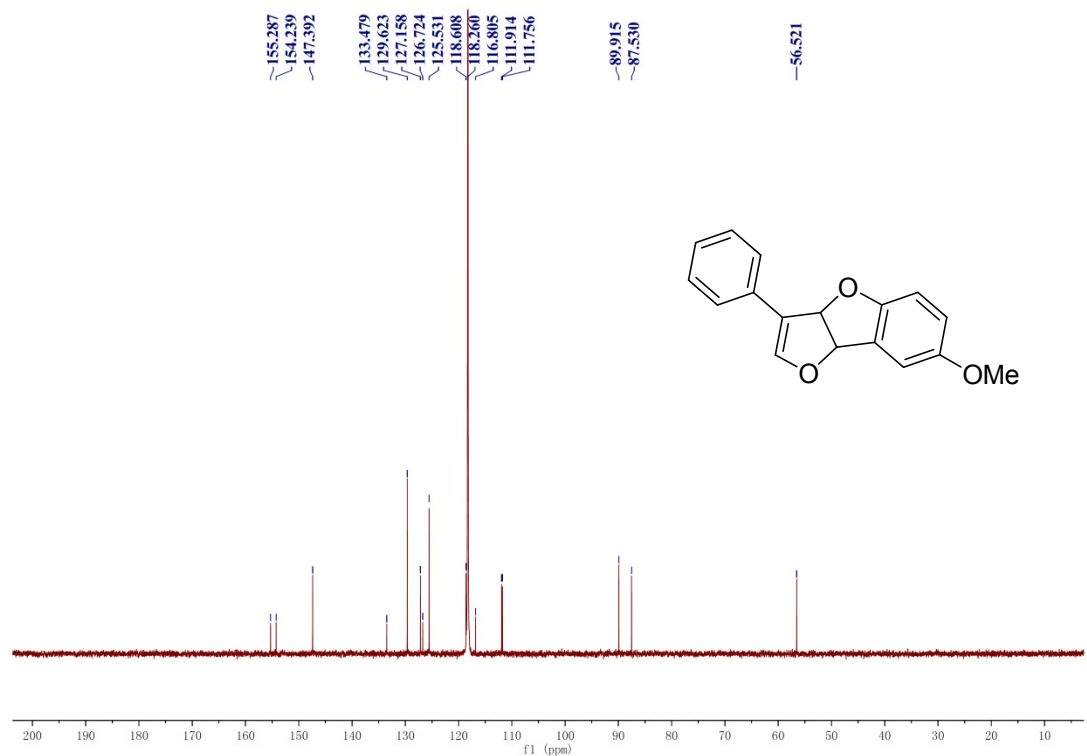

# 4e (CDCl<sub>3</sub>)

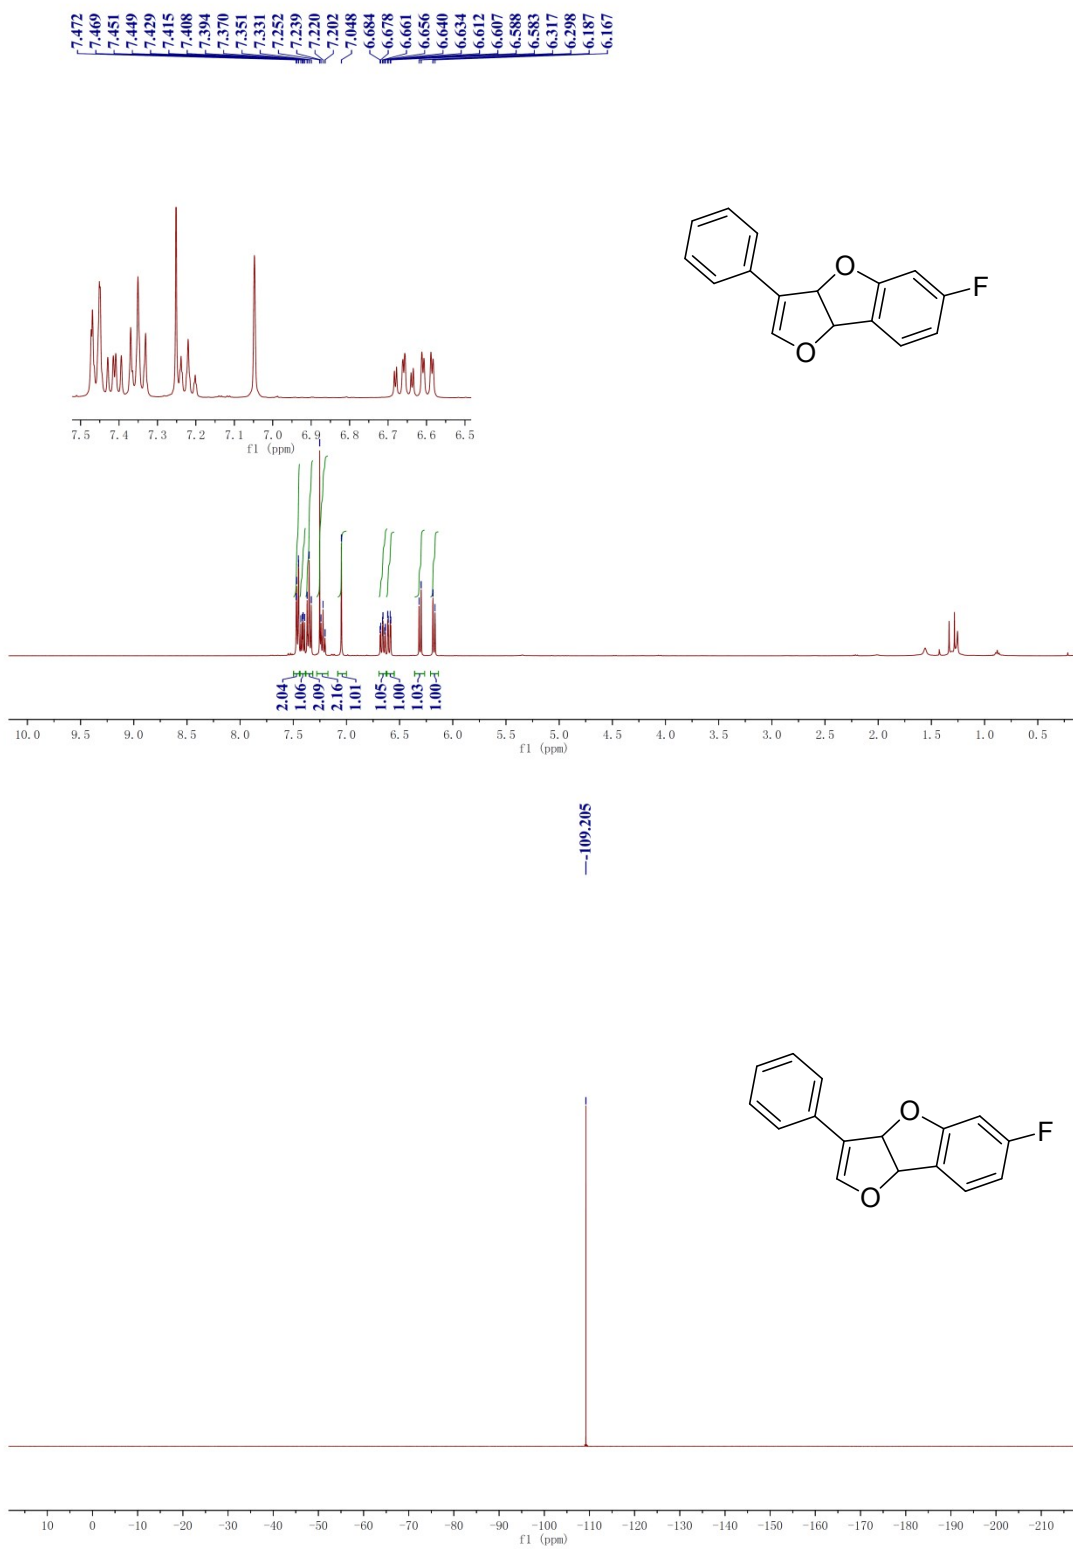

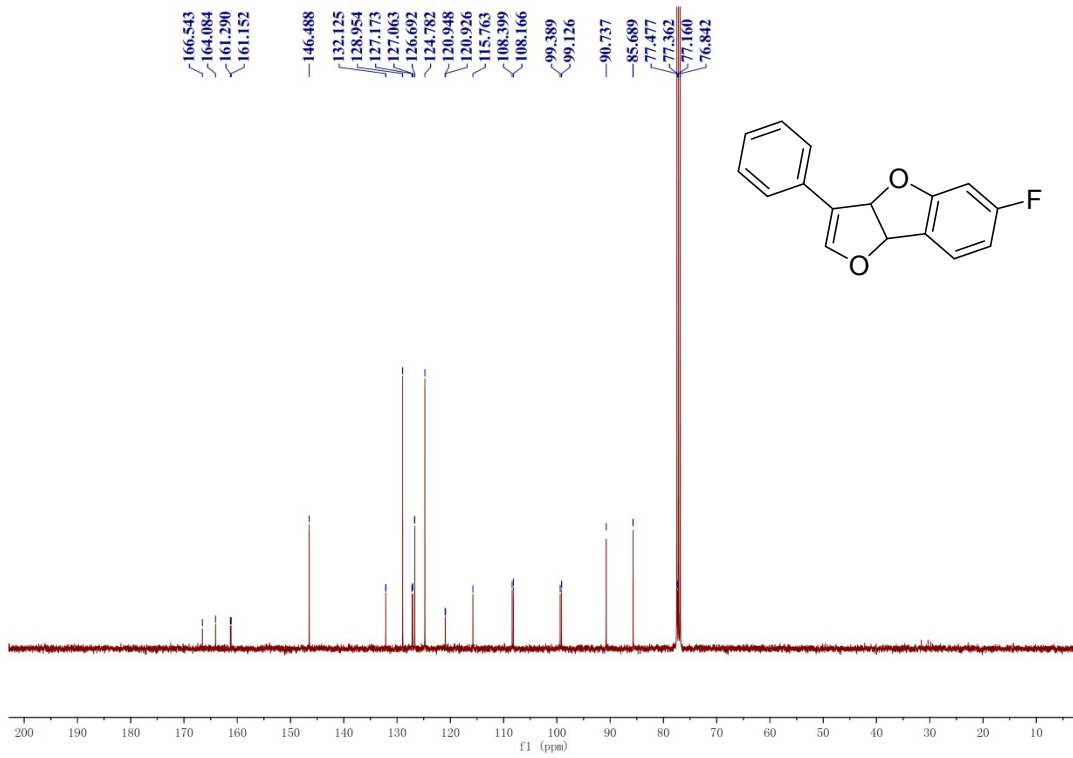

# 4f (CD<sub>3</sub>CN)

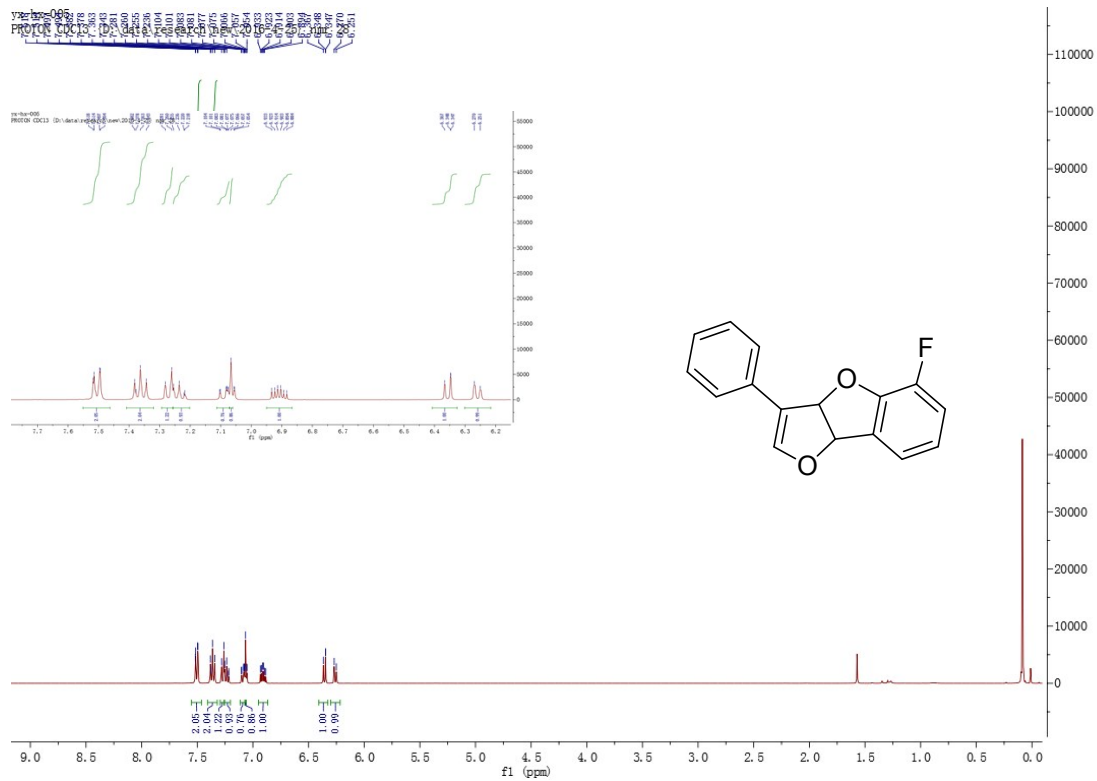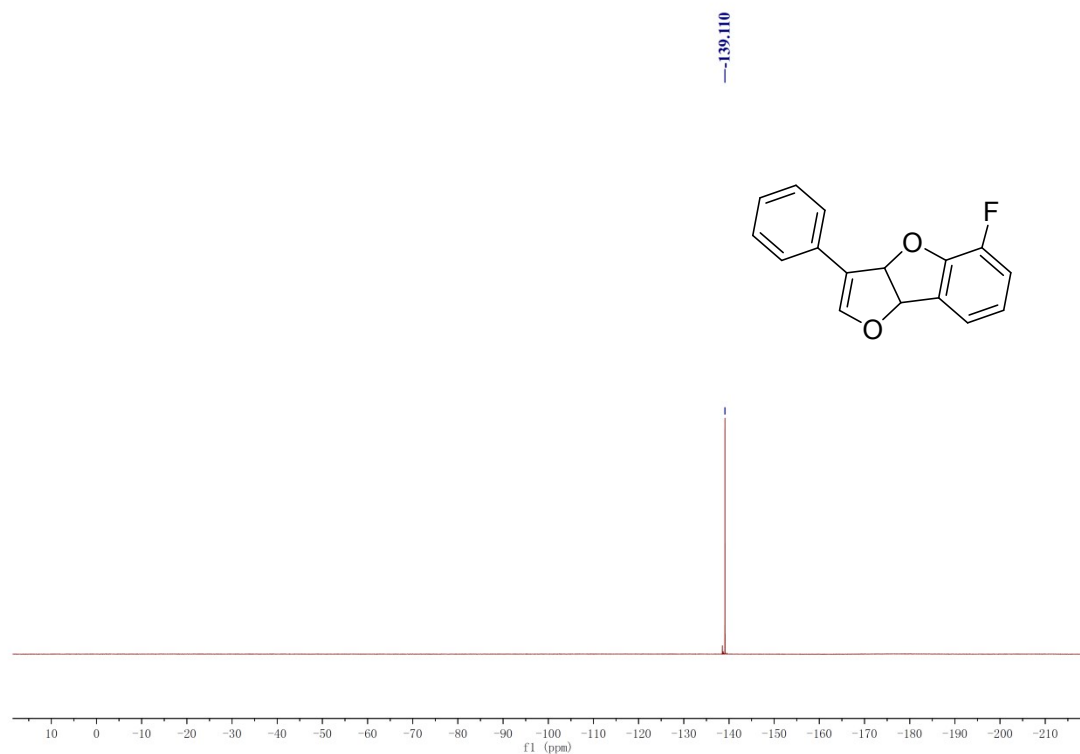

yx-hx-005  
C13CPD CDCl3 {D:\data\research\new\2016

149.807  
149.741  
149.731  
149.651  
46  
133.873  
128.933  
128.532  
128.525  
128.525  
124.939  
121.719  
121.637  
118.268  
118.252  
115.785

80.286  
86.259  
86.255  
77.476  
77.100  
76.842

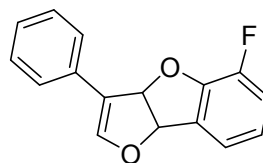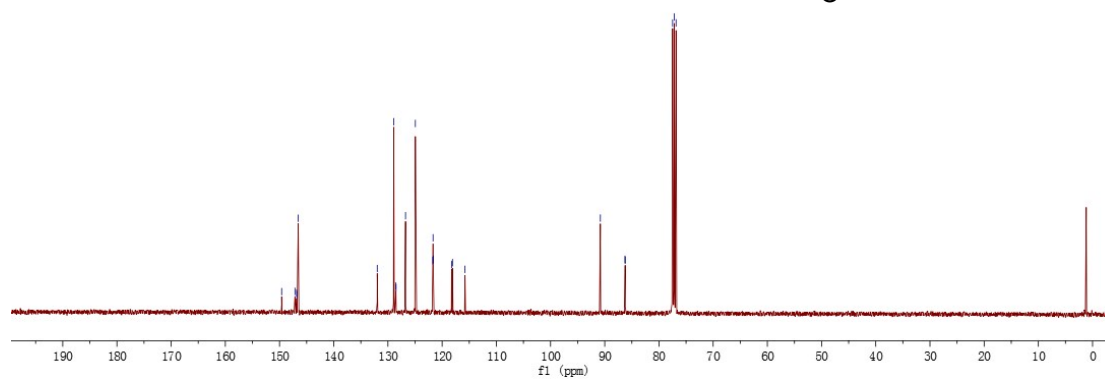

# 4g (CD<sub>3</sub>CN)

7.491  
7.472  
7.451  
7.375  
7.356  
7.336  
7.281  
7.274  
7.261  
7.254  
7.239  
7.219  
7.202  
7.086  
7.079  
7.063  
7.056  
7.041  
7.034  
6.849  
6.839  
6.827  
6.817  
6.386  
6.366  
6.265  
6.245

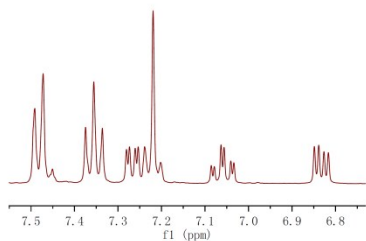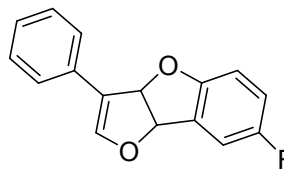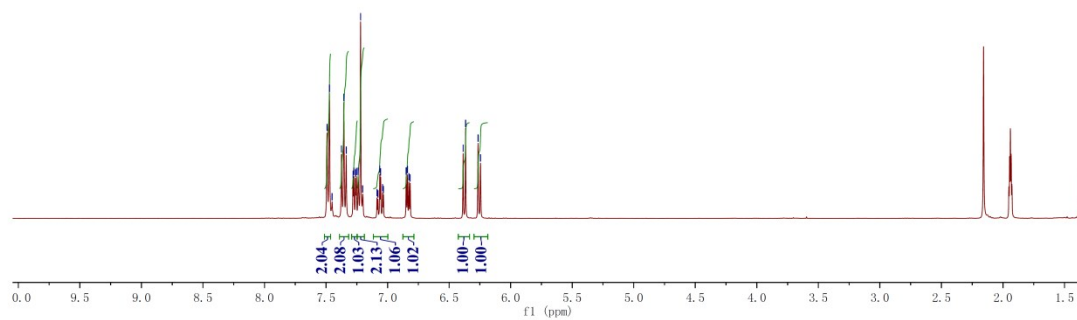

-125.523

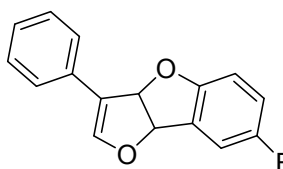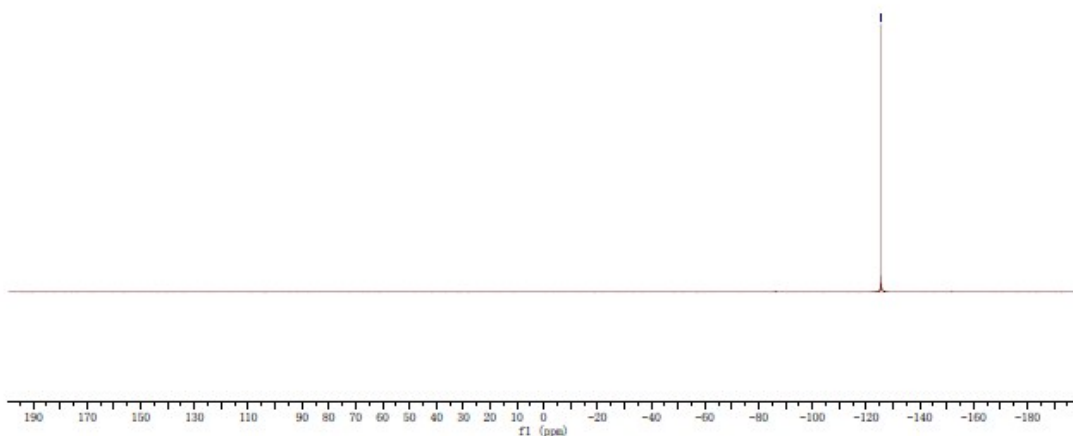

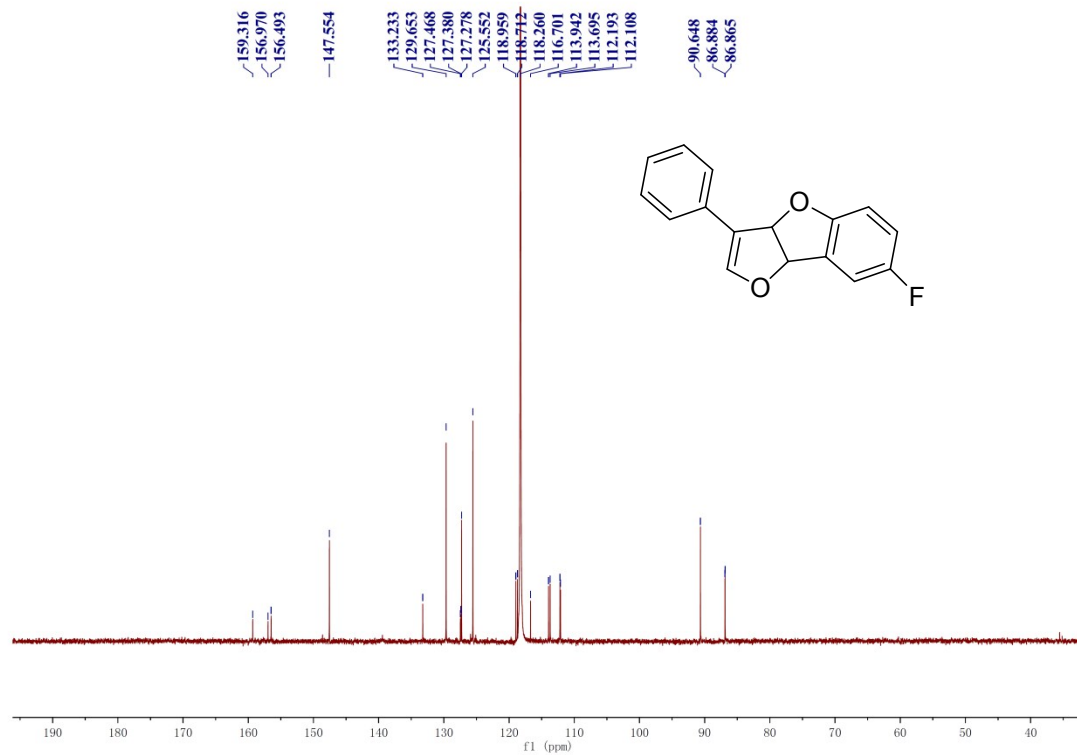



# 4h (CDCl<sub>3</sub>)

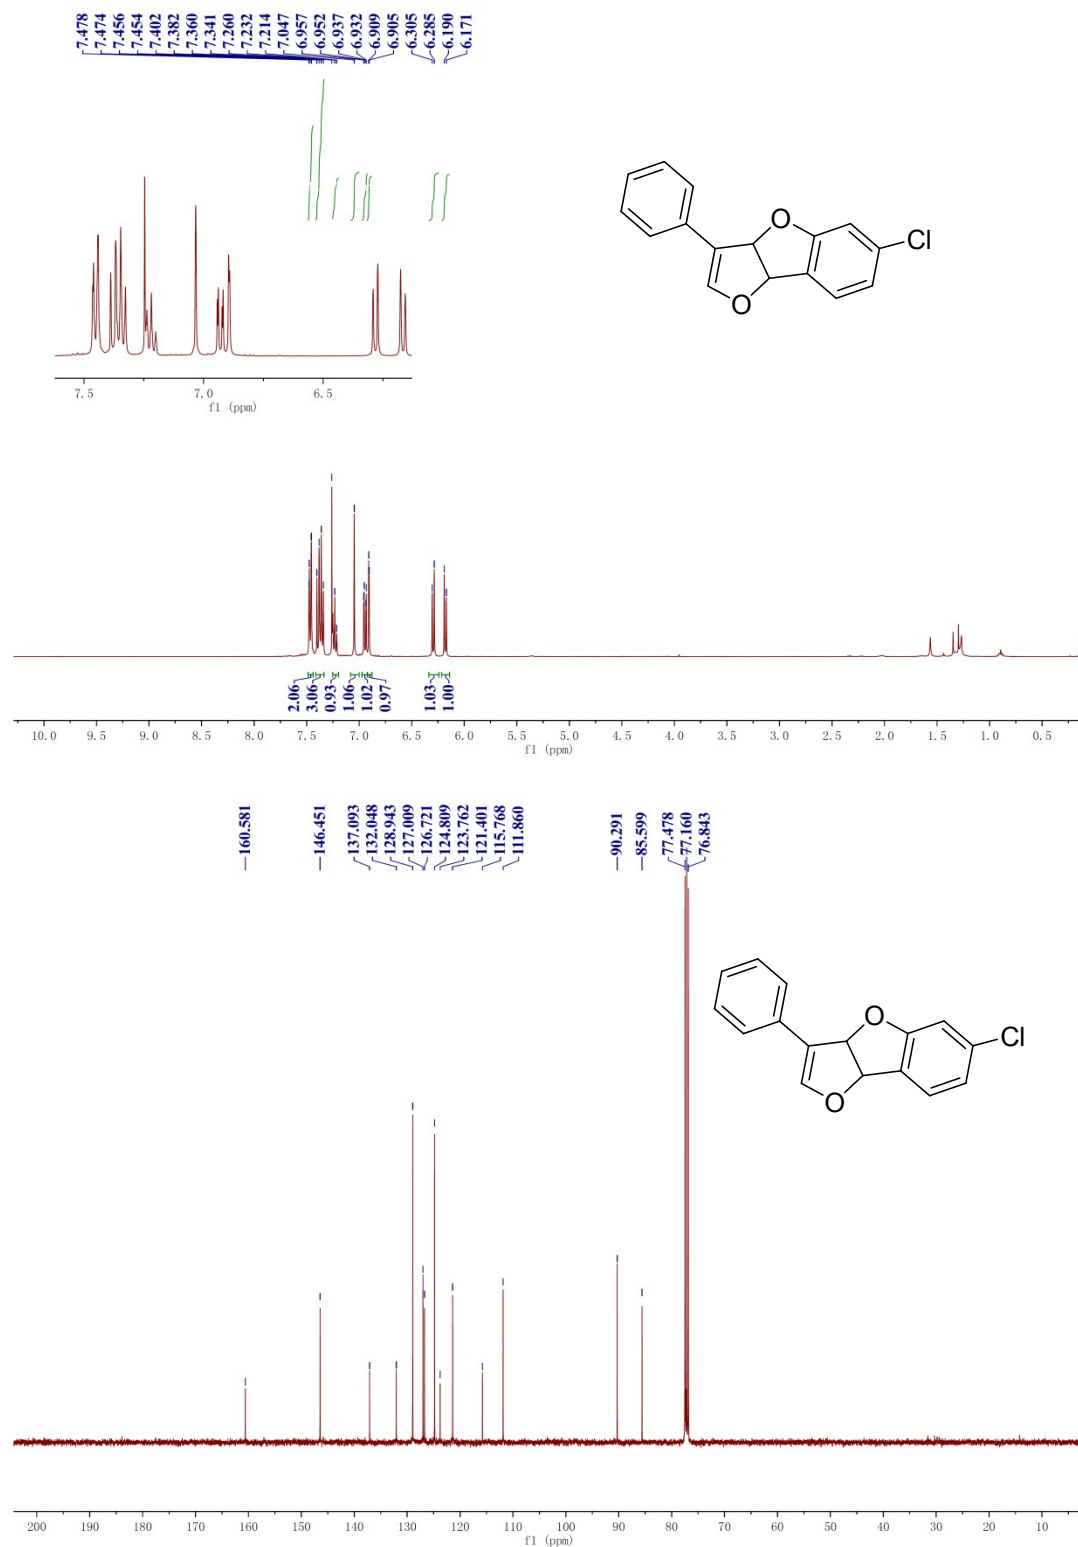



# 4j (CDCl<sub>3</sub>)

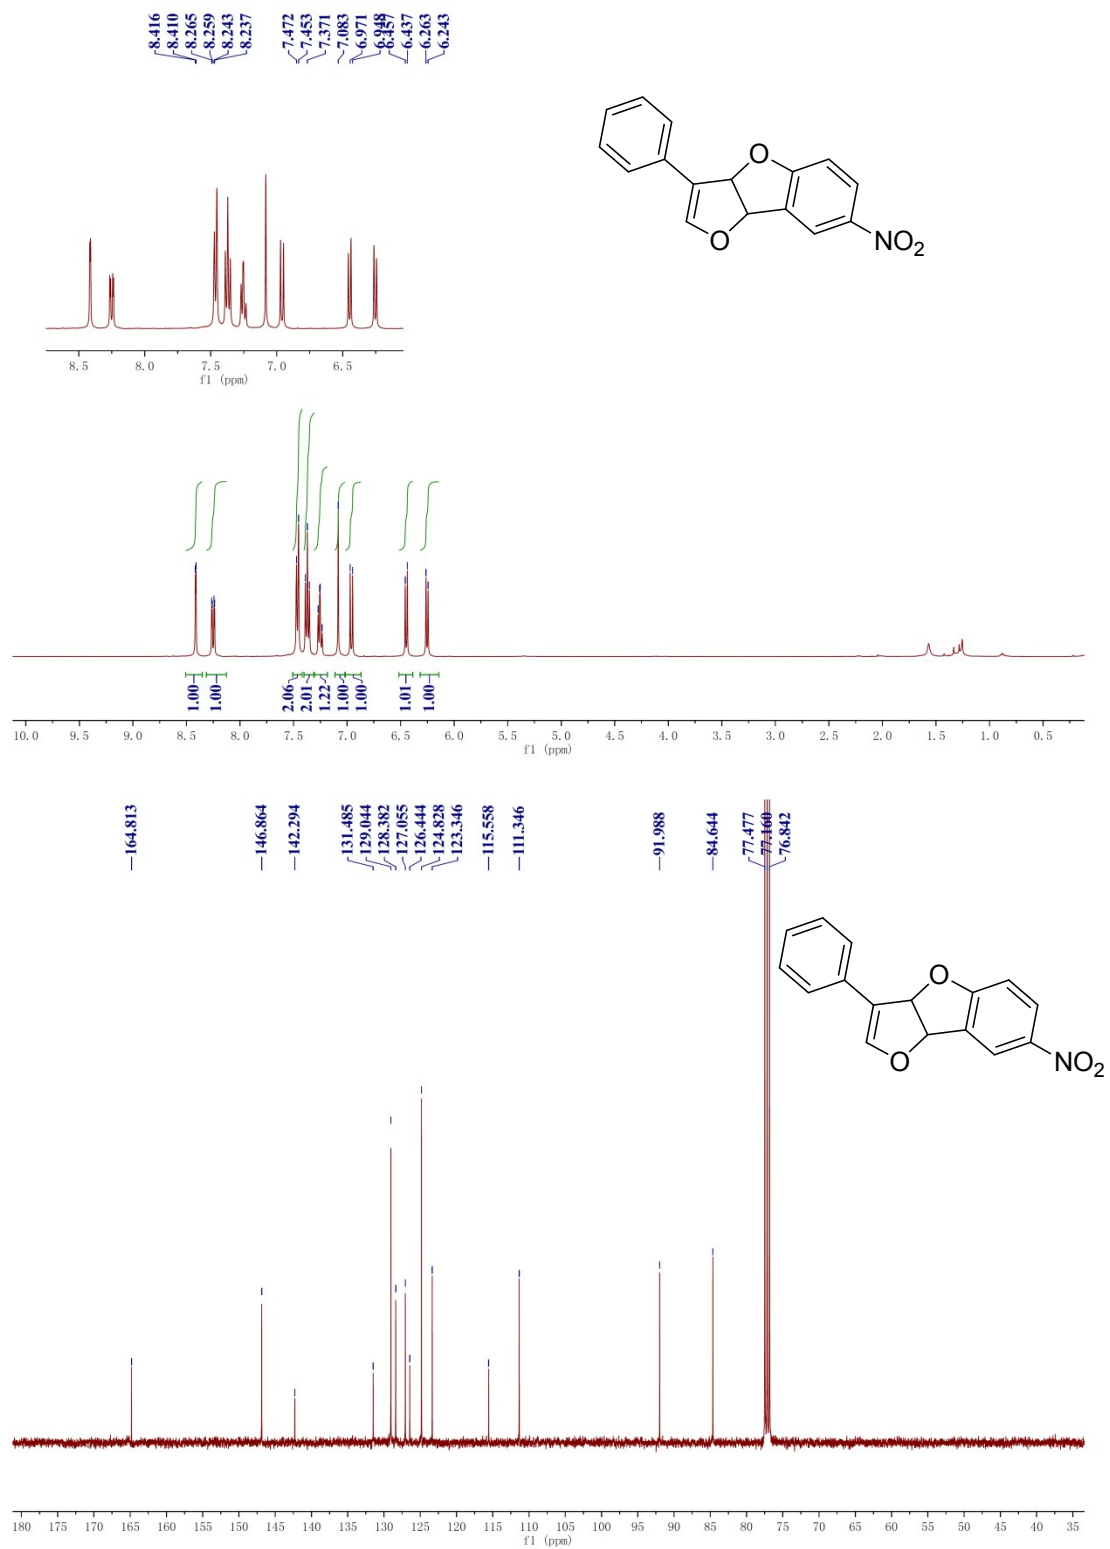

# 4k (CDCl<sub>3</sub>)

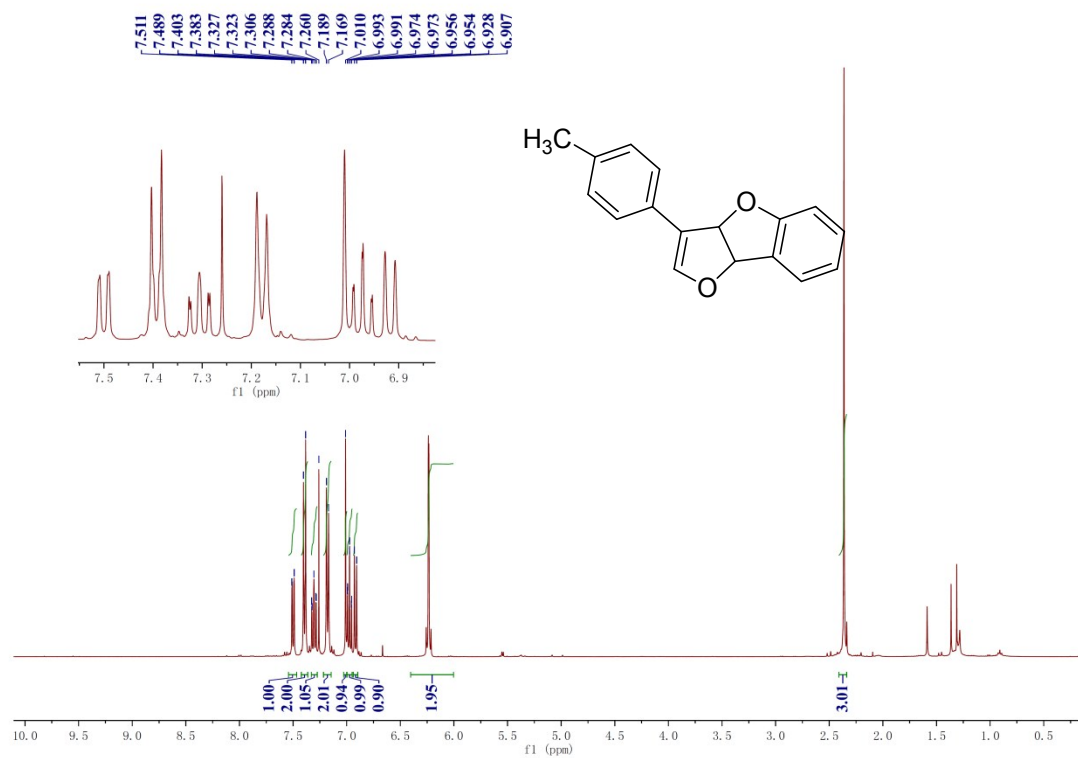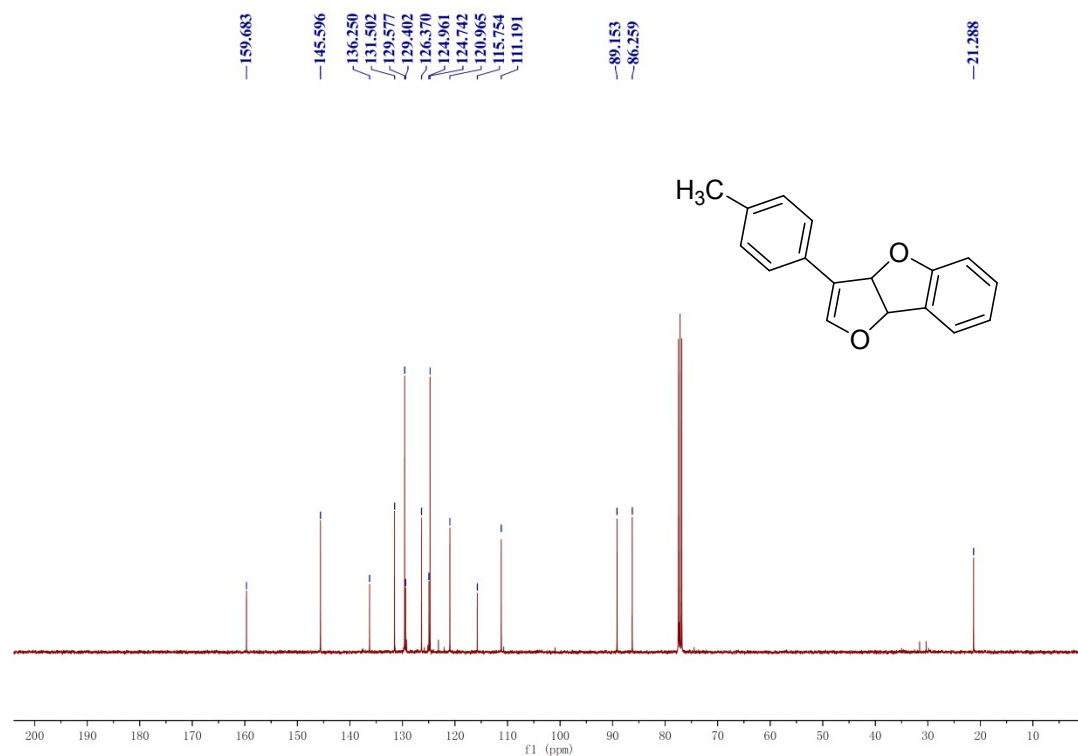

# 4I (CD<sub>3</sub>CN)

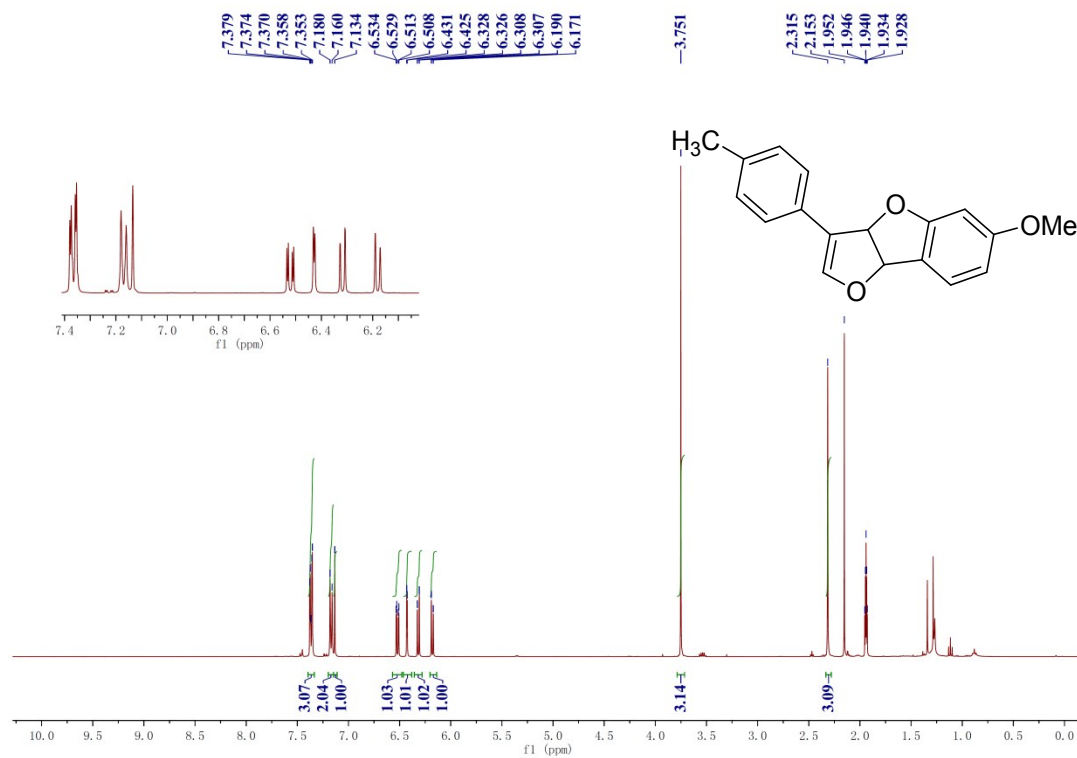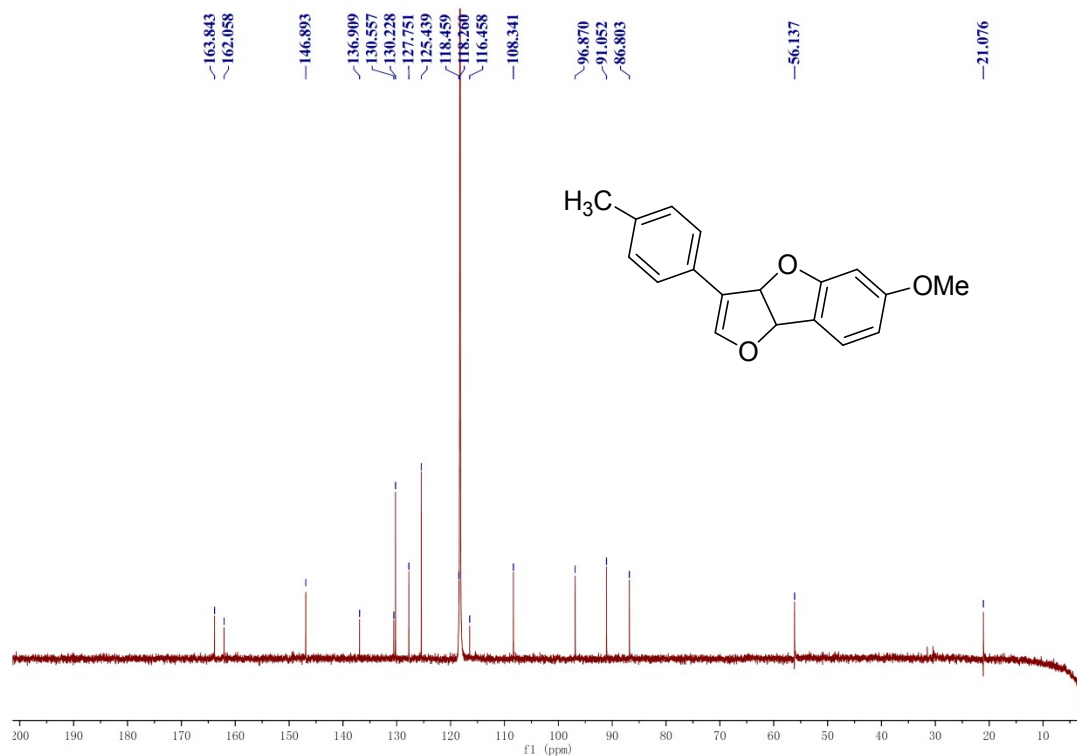

# 4m (CD<sub>3</sub>CN)

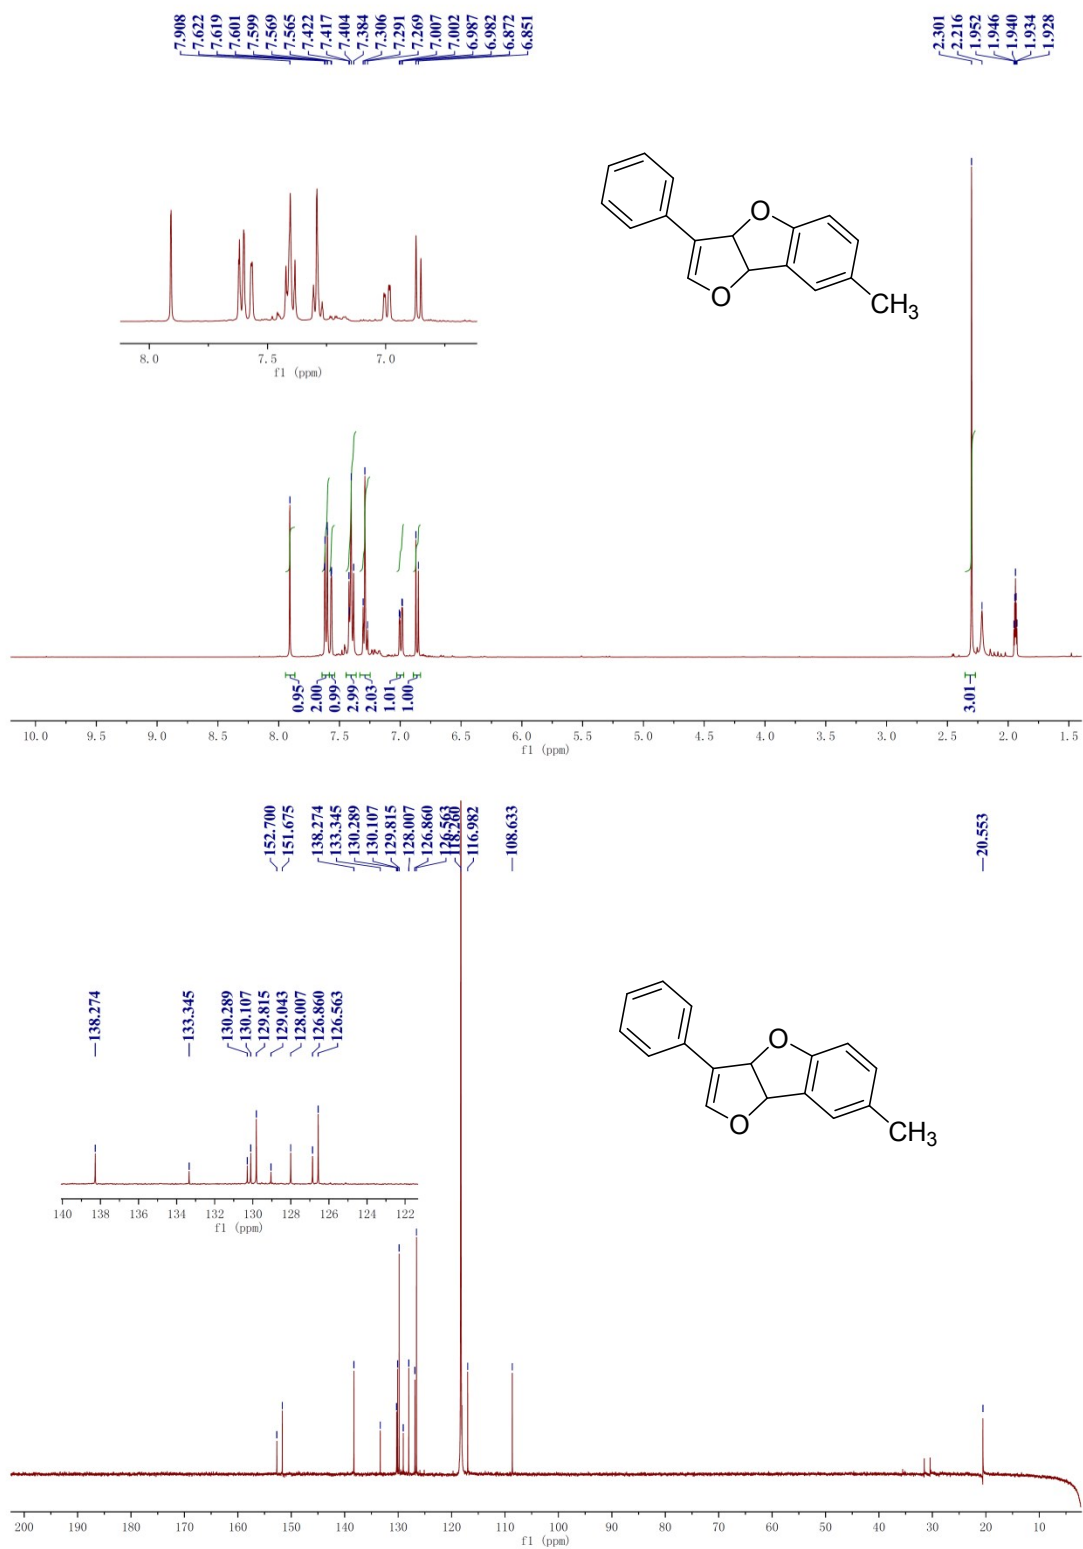

Supplement: c6ra06840e1.pdf [file c6ra06840e1.pdf]
